# Supplementary material
Source: MDPI journal article supplement (https://www.mdpi.com/2071-1050/6/11/7514)
Supplement: s1 [file s1]

## Supplementary Materials

### S1. Detailed Methods

This Supplementary Material section describes the detailed methodology for the analysis of social burdens embodied in trade and footprint calculations. This section is divided in two sections. This section presents the model used, the undesired labor conditions (or “bad labor”) indicators and data sources, and trade-linking of social burdens to sectors and regions in the model.

#### *S.1.1. Model and Data*

Social impacts embodied in consumption were calculated using EXIOBASE (version 2), a fully integrated multi-regional input-output (MRIO) database developed in the European Union (EU)-funded project EXIOPOL [1], and recently updated in the also EU-funded project CREEA [2].

The model represents the world economy for 2007, and comprises 163 industries and 200 products traded in and between 43 countries and 5 broad Rest of the world (RoW) regions (EU-27 plus 16 countries: Norway, Switzerland, United States, Canada, Australia, Japan, South Korea, Taiwan, Turkey, Russia, Mexico, Brazil, South Africa, China, Indonesia, and India, and RoW regions Asia and the Pacific, Latin America and the Caribbean, Africa, Middle East, and Other Europe). Monetary data sources and trade flows were mainly obtained by national accounts and SUTs and IOTs for each country.

Primary sources for labor inputs were national labor force surveys, gathered from the International Labour Organization (ILO) LABORSTA Database [3], and a combination of labor force and industrial surveys in national accounts, obtained from the Organisation for Economic Co-operation and Development (OECD)’s STAN Database [4]. Labor data from ILO consist of 39 economic sectors, whereas STAN’s data cover up to 60 industries, which provide better allocation to economic output in the MRIO sectors. Labor inputs were disaggregated from broad economic sectors into industries in the MRIO according to the compensation of employees from the model. The disaggregation was made under the assumption that, inside a broad economic sector industry, average wages and hours worked would be similar between all workers.

We used the industry model for this study. Although the use of the product model delivers lower uncertainty in trade flows, the industry model delivers lower uncertainty to the industry allocation of employment data.

#### *S1.1.1. Bad Labor Indicators*

We calculated bad labor conditions embodied in consumption, what we called “Bad Labor Footprint”. It accounts for all undesirable labor conditions embodied in the production of goods and services. Undesirable labor conditions—bad labor—indicators assessed in the current study are occupational health, vulnerable employment, gender inequality, predominance of low-skilled labor, child labor, and forced labor. Footprints for each of the bad labor conditions were calculated through the Equation (1) below.

$$BLF^r = BL_i \text{ diag}(L \times y^r) \quad (1)$$

where:

$BLF^r$  = Bad Labor Footprint of region  $r$ .

BL = vector containing direct coefficients of bad labor indicator per unit of output for each industry and region.

L = Leontief inverse matrix, which reflects the relation between production and output of each industry, and allows the estimate of direct plus indirect input requirements from each sector to produce each unit of final demand.

$y^r$  = total consumption of a region, which is domestic production to domestic final demand and imports from every other region to both final demand and interindustry of region  $r$ .

All bad labor conditions indicators were linked to total employment embodied in trade. The underlying assumption is that bad labor conditions are equally spread among domestic- and exports-oriented industries. The results presented account for both intra- and inter-regional trade. Goods and services produced and consumed inside a same country or traded between countries in the same region (for example, from the United States to Canada) are considered intra-region trade. Alternatively, traded products between countries in different regions account for inter-region flows. All footprints were calculated for the full MRIO model, detailed in 163 sectors and 48 regions. Results were then re-aggregated into seven regions and eight consumption categories. The regions of the study and the consumption categories are presented in Table S.1.1. The trade-linking and allocation methods are explained in Section S.1.2.2.

**Table S.1.1.** Regions and consumption categories in the study.

| Region |                  | Consumption Category |                       |
|--------|------------------|----------------------|-----------------------|
| 1      | Africa           | 1                    | Food                  |
| 2      | Middle East      | 2                    | Clothing              |
| 3      | North America    | 3                    | Shelter               |
| 4      | Latin America    | 4                    | Construction          |
| 5      | Asia and Pacific | 5                    | Manufactured products |
| 6      | Europe OECD      | 6                    | Mobility              |
| 7      | Other Europe     | 7                    | Services              |
|        |                  | 8                    | Trade                 |

#### (a) Occupational Health Damage

In order to facilitate a comparative risk assessment between economic sectors, the burden of disease per sector output was estimated. The burden of disease with regard to population health can be quantified with various measures, e.g., years of life lost (YLL), years of life live disabled (YLD), quality-adjusted life years (QALY), disability-adjusted life expectancy (DALE), healthy life years, and disability-adjusted life years (DALY) [5–8]. Here, we used DALY, which is the most commonly used. DALY measures the gap between the current situation and an ideal situation in which everyone lives up to the standard life expectancy in perfect health. It is one measure combining the time lived with disabilities (YLD) and the time lost due to premature mortality (YLL). DALYs are a function of the value of time lived at different ages, the severity of morbidity, and a discount rate for years of health benefit. We followed the methodology of the World Health Organization (WHO), as described in detail by Nelson *et al.* [9]. We refer to a paper by Murray [10] for the technical basis of the DALY. The year 2000 was taken as a reference, since up to 2000 the most detailed statistics have been reported [11–13]. For the Global

Burden of Disease 2000 study, the WHO applied the default 3% time discount rate to years of life lost in the future, and non-uniform age weighting [9,10]. The latter means that they valued a year of life in young adulthood more than a year in old age or infancy.

We focused on seven types of health risks: (1) cancer of the trachea, bronchus or lung (from now on referred to as lung cancer); (2) leukemia; (3) asthma; (4) chronic obstructive pulmonary disease (COPD); (5) noise-induced hearing loss (NHL); (6) low back pain (LBP); and (7) occupational injuries.

The consequences of occupational exposure within an economic sector for the population health were quantified in attributable fractions (AF). These express the fraction of the morbidity and/or mortality of a disease that can be attributed to a specific risk factor, for example, occupational exposure within an economic sector (Equation (2)).

$$AF = \frac{\sum_{i=0}^k f_i(RR_i - 1)}{\sum_{i=0}^k f_i(RR_i - 1) + 1} \quad (2)$$

where:

$f_i$  = the proportion of a population exposed to the risk factor at  $k$  levels of exposure

$RR_i$  = the relative risk of morbidity and/or mortality from a specific adverse health effect due to that exposure.

The AFs per economic sector were used to distribute the region-specific DALYs reported by the WHO over the economic sectors (Equation (3)):

$$DALY_{s_{occ,s}} = \frac{AF_{occ,s}}{\sum_{s=1}^n AF_{occ,s}} \times DALY_{s_{occ,tot}} \quad (3)$$

where:

$AF_{occ,s}$  = the attributable fraction of occupational exposure for a specific disease in economic sector  $s$ .

$DALY_{s_{occ,s}}$  = the number of DALYs for a specific disease attributable to occupational exposure in economic sector  $s$

$DALY_{s_{occ,tot}}$  = the total number of DALYs for a specific disease attributable to occupational exposure.

$n$  = the number of sectors.

The World Health Organization (WHO) distinguishes 14 regions based on the basis of levels of child mortality under 5 years of age and 15–59-year-old male mortality [9]. The 14 WHO regions were aggregated into 7 regions used in this study (Table S.1.2):

**Table S.1.2.** Correspondence between regions in the WHO data [9] and regions in the current study.

|   | Study Region     | WHO Regions                    |
|---|------------------|--------------------------------|
| 1 | Africa           | AFR-D, AFR-E                   |
| 2 | Middle East      | EMR-B, EMR-D                   |
| 3 | North America    | AMR-A                          |
| 4 | Latin America    | AMR-B, AMR-D                   |
| 5 | Asia and Pacific | SEAR-B, SEAR-D, WPRO-A, WPRO-B |
| 6 | Europe OECD      | EUR-A                          |
| 7 | Other Europe     | EUR-B, EUR-C                   |

Disease burdens associated with work were allocated to employment inputs to each of the 163 sectors in the MRIO model sector, explained in detail in Section A.2.2. Occupational health burdens were calculated as rates of DALYs per thousand employees in each of the regions for 2000, and applied to the number of employees in the MRIO model for 2007. We assumed no change in DALYs rates per person between 2000 and 2007. For all diseases, we distributed DALYs per disease per region provided by Concha-Barrientos *et al.* [11] by using the calculated AF as weighting factor. The assumptions for calculating the AF for each of the specific diseases are presented below. Table A.4, at the end of this methods section, summarizes these assumptions.

- *Lung Cancer and Leukemia*

Concha-Barrientos *et al.* [11] provide the mean proportions of workers exposed to selected carcinogens, by economic sector and subsector, in the European Union, and assumed that the proportion of workers exposed to a particular carcinogen in a specific economic subsector was constant throughout the world. We used the same data to calculate the proportions of the population exposed to selected carcinogens, per economic sector. We take into account the occupational turnover and exposure level. We used exposure level-specific RR to calculate the attributable fraction. Partitioning into low or high exposure depends on the region. For developed regions (*i.e.*, A-regions), 10% of the exposed workers have low exposures (at or below the permissible exposure limit—PEL), and 90% of the exposed workers have high exposures (above the PEL). For developing regions (B-, C-, D-, and E-regions), 50% of the exposed workers have low exposures, whereas 50% of the exposed workers have high exposures. For regions composed of multiple WHO-regions, we used the weighted average.

- *Chronic Obstructive Pulmonary Disease (COPD)*

Concha-Barrientos *et al.* [11] provide the proportion of the population exposed to agents causing COPD, by sub-region, sex, and level of exposure (background, low, or high). We use exposure level-specific RR to estimate the AF:

- I. Background exposure: people not in the workforce and workers in utility, trade, finance, and services;
- II. Low exposure: workers in agriculture, manufacturing, and transportation;
- III. High exposure: workers in mining and construction activities.

The RR also differs between developed and developing regions. For developed regions (A), RR is on average 1.3 for the low exposure group (average between men, 1.4, and women, 1.2), and 1.6 for the high-exposure one (1.8 for men and 1.4 for women). For developing regions (B-E), RR is on average 1.15 for the low exposure group (1.2 for men and 1.1 for women), and 1.6 for the high exposure one (1.8 for men and 1.4 for women). For regions composed of multiple WHO-regions, we used the weighted average.

- *Asthma*

Regarding asthma, the WHO considers more important WHAT people do (*i.e.*, occupational category) than WHERE they perform their activities (*i.e.*, economic sector). The RRs are based, therefore, on occupational categories. We suppose that the majority of workers in a particular economic sector work in similar occupation categories, and we base the calculations on the assumption that all workers in

the same economic sectors perform the same type of job (*i.e.*, are in the same occupational category). See Table A.4 below for more details. As occupational category can be a proxy for exposure to asthmagens, we applied occupational category-specific RR to estimate the AF.

- *Noise-Induced Hearing Loss (NHL)*

For NHL, the WHO also considers more important WHAT people do than WHERE they perform their activities. We therefore use the same assumptions as in the asthma case. We applied occupational category-specific prevalence data (see Table S.1.3) to calculate the proportion of workers exposed for each exposure level (85–90 dBa, and higher than 90 dBa). The prevalence of noise exposure in occupational categories differs between developed (A) and developing (B–E) regions. Small differences can be found in occupational categories “agriculture”, “mining”, and “manufacturing”. For regions composed of multiple WHO-regions, we used the weighted average.

The RR was applied to estimate the AF. Whilst relative risks for noise differ between age groups, we used an average RR for workers aged 15–69 years, covered by labor force surveys. For exposure level of 85–90 dBa, average RR used was of 1.9, and for levels higher than 90 dBa, average RR was 5.1.

- *Low Back Pain (LBP)*

For LBP, the WHO also considers more important WHAT people do than WHERE they perform their activities. We therefore use the same assumptions as in the previous two cases. We applied occupational category-specific RR to estimate the AF (see Table S.1.3).

- *Injuries*

The global burden due to occupational injuries was difficult to quantify due to the limited availability of data. We used injury incidence rates per economic sector from the EU-15 [12], and worked under the assumption that the proportion of workers getting involved in an accident in a specific economic sector was constant throughout the regions. For mining and services, no incidence values are available. For all mining sectors same incident rate as for manufacturing were applied. For services, we applied the same incidence rate as for trade. Incidence rates for more than three days of absence and fatal injuries were summed to estimate the total proportion of workers being injured per economic sector.

Concha-Barrientos *et al.* [13] provide AFs for all WHO regions for occupational injuries. We used the proportion of workers with injuries per economic sector as a weighting factor to distribute the AFs over the economic sectors in the model. For regions composed of multiple WHO-regions, we used the average AF.

**Table S.1.3.** Assumptions for DALYs calculations.

| Economic Sector                                                                                                                      | Lung Cancer<br>and Leukemia                    | COPD                                    | Asthma                                         | Noise-Induced<br>Hearing Loss                                            | Low Back Pain                                  | Injuries                                                                  |
|--------------------------------------------------------------------------------------------------------------------------------------|------------------------------------------------|-----------------------------------------|------------------------------------------------|--------------------------------------------------------------------------|------------------------------------------------|---------------------------------------------------------------------------|
|                                                                                                                                      | Exposure Based<br>on WHO<br>Economic<br>Sector | RR Based on<br>WHO<br>Exposure<br>Level | RR Based on<br>WHO<br>Occupational<br>Category | Prevalence of Noise<br>Exposure Based on<br>WHO Occupational<br>Category | RR Based on<br>WHO<br>Occupational<br>Category | RR Based on EU-15 Economic Sector                                         |
| 1 Agriculture, Hunting and Forestry                                                                                                  | Agriculture                                    | Low                                     | Agriculture                                    | Agriculture                                                              | Agriculture                                    | Agriculture                                                               |
| 2 Fishing, operating of fish hatcheries and fish farms;<br>service activities incidental to fishing                                  | Agriculture                                    | Low                                     | Agriculture                                    | Agriculture                                                              | Agriculture                                    | Agriculture                                                               |
| 3 Mining and Quarrying                                                                                                               | Mining                                         | High                                    | Mining                                         | Production                                                               | Service and<br>production workers              | Manufacturing                                                             |
| 4 Manufacture of Food Products and Beverages                                                                                         | Manufacturing                                  | Low                                     | Manufacturing                                  | Production                                                               | Service and<br>production workers              | Manufacture of food products;<br>beverages and tobacco                    |
| 5 Manufacture of Tobacco Products                                                                                                    | Manufacturing                                  | Low                                     | Manufacturing                                  | Production                                                               | Service and<br>production workers              | Manufacture of food products;<br>beverages and tobacco                    |
| 6 Manufacture of Textiles                                                                                                            | Manufacturing                                  | Low                                     | Manufacturing                                  | Production                                                               | Service and<br>production workers              | Manufacture of textiles and<br>textile products                           |
| 7 Manufacture of Wearing Apparel; Dressing and<br>Dyeing of Fur                                                                      | Manufacturing                                  | Low                                     | Manufacturing                                  | Production                                                               | Service and<br>production workers              | Manufacture of textiles and<br>textile products                           |
| 8 Tanning and Dressing of Leather; Manufacture of<br>Luggage, Handbags, Saddlery, Harness and Footwear                               | Manufacturing                                  | Low                                     | Manufacturing                                  | Production                                                               | Service and<br>production workers              | Manufacture of leather and<br>leather products                            |
| 9 Manufacture of Wood and Products of Wood and<br>Cork, except Furniture; Manufacture of articles of<br>Straw and Plaiting Materials | Manufacturing                                  | Low                                     | Manufacturing                                  | Production                                                               | Service and<br>production workers              | Manufacture of wood and<br>wood products                                  |
| 10 Manufacture of Paper and Paper Products                                                                                           | Manufacturing                                  | Low                                     | Manufacturing                                  | Production                                                               | Service and<br>production workers              | Manufacture of pulp, paper and paper<br>products; publishing and printing |
| 11 Publishing, Printing and Reproduction of<br>Recorded Media                                                                        | Manufacturing                                  | Low                                     | Manufacturing                                  | Production                                                               | Service and<br>production workers              | Manufacture of pulp, paper and paper<br>products; publishing and printing |
| 12 Manufacture of Coke, Refined Petroleum Products<br>and Nuclear Fuel                                                               | Manufacturing                                  | Low                                     | Manufacturing                                  | Production                                                               | Service and<br>production workers              | Manufacture of coke, refined petroleum<br>products and nuclear fuel       |
| 13 Manufacture of Chemicals and Chemical Products                                                                                    | Manufacturing                                  | Low                                     | Manufacturing                                  | Production                                                               | Service and<br>production workers              | Manufacture of chemicals, chemical<br>products and man-made fibers        |

Table S.1.3. Cont.

| Economic Sector                                                                     | Lung Cancer<br>and Leukemia                    | COPD                                    | Asthma                                      | Noise-Induced<br>Hearing Loss                                            | Low Back Pain                                  | Injuries                                                     |
|-------------------------------------------------------------------------------------|------------------------------------------------|-----------------------------------------|---------------------------------------------|--------------------------------------------------------------------------|------------------------------------------------|--------------------------------------------------------------|
|                                                                                     | Exposure Based<br>on WHO<br>Economic<br>Sector | RR Based on<br>WHO<br>Exposure<br>Level | RR Based on WHO<br>Occupational<br>Category | Prevalence of Noise<br>Exposure Based on<br>WHO Occupational<br>Category | RR Based on<br>WHO<br>Occupational<br>Category | RR Based on EU-15 Economic Sector                            |
| 14 Manufacture of Rubber and Plastic Products                                       | Manufacturing                                  | Low                                     | Manufacturing                               | Production                                                               | Service and<br>production workers              | Manufacture of rubber and<br>plastic products                |
| 15 Manufacture of Other Non-Metallic Mineral Products                               | Manufacturing                                  | Low                                     | Manufacturing                               | Production                                                               | Service and<br>production workers              | Manufacture of other<br>non-metallic mineral products        |
| 16 Manufacture of Basic Metals                                                      | Manufacturing                                  | Low                                     | Manufacturing                               | Production                                                               | Service and<br>production workers              | Manufacture of basic metals and<br>fabricated metal products |
| 17 Manufacture of Fabricated Metal Products, except<br>Machinery and Equipment      | Manufacturing                                  | Low                                     | Manufacturing                               | Production                                                               | Service and<br>production workers              | Manufacture of basic metals and<br>fabricated metal products |
| 18 Manufacture of Machinery and Equipment <i>n.e.c.</i>                             | Manufacturing                                  | Low                                     | Manufacturing                               | Production                                                               | Service and<br>production workers              | Manufacture of machinery and<br>equipment <i>n.e.c.</i>      |
| 19 Manufacture of Office, Accounting and<br>Computing Machinery                     | Manufacturing                                  | Low                                     | Manufacturing                               | Production                                                               | Service and<br>production workers              | Manufacture of electrical and<br>optical equipment           |
| 20 Manufacture of Electrical Machinery and<br>Apparatus <i>n.e.c.</i>               | Manufacturing                                  | Low                                     | Manufacturing                               | Production                                                               | Service and<br>production workers              | Manufacture of electrical and<br>optical equipment           |
| 21 Manufacture of Radio, Television and<br>Communication Equipment and Apparatus    | Manufacturing                                  | Low                                     | Manufacturing                               | Production                                                               | Service and<br>production workers              | Manufacture of electrical and<br>optical equipment           |
| 22 Manufacture of Medical, Precision and Optical<br>Instruments, Watches and Clocks | Manufacturing                                  | Low                                     | Manufacturing                               | Production                                                               | Service and<br>production workers              | Manufacture of electrical and<br>optical equipment           |
| 23 Manufacture of Motor Vehicles, Trailers<br>and Semi-Trailers                     | Manufacturing                                  | Low                                     | Manufacturing                               | Production                                                               | Service and<br>production workers              | Manufacture of transport equipment                           |
| 24 Manufacture of other Transport Equipment                                         | Manufacturing                                  | Low                                     | Manufacturing                               | Production                                                               | Service and<br>production workers              | Manufacture of transport equipment                           |
| 25 Manufacture of Furniture; Manufacturing <i>n.e.c.</i>                            | Manufacturing                                  | Low                                     | Manufacturing                               | Production                                                               | Service and<br>production workers              | Manufacturing <i>n.e.c.</i>                                  |
| 26 Recycling                                                                        | Manufacturing                                  | Low                                     | Manufacturing                               | Production                                                               | Service and<br>production workers              | Manufacturing <i>n.e.c.</i>                                  |

Table S.1.3. Cont.

|    |                                                                                                          | Lung Cancer<br>and Leukemia                 | COPD                                    | Asthma                                         | Noise-Induced<br>Hearing Loss                                            | Low Back Pain                               | Injuries                                                                  |
|----|----------------------------------------------------------------------------------------------------------|---------------------------------------------|-----------------------------------------|------------------------------------------------|--------------------------------------------------------------------------|---------------------------------------------|---------------------------------------------------------------------------|
|    |                                                                                                          | Exposure Based<br>on WHO<br>Economic Sector | RR Based on<br>WHO<br>Exposure<br>Level | RR Based on<br>WHO<br>Occupational<br>Category | Prevalence of Noise<br>Exposure Based on<br>WHO Occupational<br>Category | RR Based on WHO<br>Occupational<br>Category | RR Based on EU-15 Economic Sector                                         |
| 27 | Electricity, Gas and Water Supply                                                                        | Electrical                                  | Background                              | Electricity                                    | Professional and<br>technical workers                                    | Service and<br>production workers           | Electricity, gas, steam and<br>hot water supply                           |
| 28 | Construction                                                                                             | Construction                                | High                                    | Construction                                   | Professional and<br>technical workers                                    | Service and<br>production workers           | Construction                                                              |
| 29 | Wholesale and Retail Trade; Repair of Motor<br>Vehicles, Motorcycles and Personal and Household<br>Goods | Trade                                       | Background                              | Trade                                          | Sales                                                                    | Clerical or sales<br>workers                | Wholesale and retail repairs                                              |
| 30 | Hotels and Restaurants                                                                                   | Trade                                       | Background                              | Trade                                          | Sales                                                                    | Clerical or sales<br>workers                | Hotels and restaurants                                                    |
| 31 | Transport, Storage and Communications                                                                    | Transport                                   | Low                                     | Transport                                      | Clerical workers                                                         | Clerical or sales<br>workers                | Transport, storage and communication                                      |
| 32 | Financial Intermediation                                                                                 | Finance                                     | Background                              | Finance                                        | Administration                                                           | Managers and<br>professionals               | Financial intermediation; real estate,<br>renting and business activities |
| 33 | Real Estate, Renting and Business Activities                                                             | Finance                                     | Background                              | Finance                                        | Administration                                                           | Managers and<br>professionals               | Financial intermediation; real estate,<br>renting and business activities |
| 34 | Public Administration and Defense; Compulsory<br>Social Security                                         | Services                                    | Background                              | Services                                       | Service workers                                                          | Service and<br>production workers           | Wholesale and retail repairs/Hotels<br>and restaurants                    |
| 35 | Education                                                                                                | Services                                    | Background                              | Services                                       | Service workers                                                          | Service and<br>production workers           | Wholesale and retail repairs/Hotels<br>and restaurants                    |
| 36 | Health and Social Work                                                                                   | Services                                    | Background                              | Services                                       | Service workers                                                          | Service and<br>production workers           | Wholesale and retail repairs/Hotels<br>and restaurants                    |
| 37 | Other Community, Social and Personal Service<br>Activities                                               | Services                                    | Background                              | Services                                       | Service workers                                                          | Service and<br>production workers           | Wholesale and retail repairs/Hotels<br>and restaurants                    |
| 38 | Private Households with Employed Persons                                                                 | Services                                    | Background                              | Services                                       | Service workers                                                          | Service and<br>production workers           | Wholesale and retail repairs/Hotels<br>and restaurants                    |
| 39 | Extra-Territorial Organizations and Bodies                                                               | Services                                    | Background                              | Services                                       | Service workers                                                          | Service and<br>production workers           | Wholesale and retail repairs/Hotels<br>and restaurants                    |



### (b) Vulnerable Employment

In several developing countries, over half of the workforce is employed in conditions of vulnerability, without proper coverage of labor regulations and guarantees. Guaranteeing decent work conditions for all, including women and young people, is at the core of poverty-reducing goals in the United Nations Millennium Development Goals. We use ILO's definition of vulnerable employment, which comprises unpaid contributing family workers and own-account workers [14]. We assume that most of workers that are not in formal paid employment, that is, are not classified as paid employees, are potentially in a vulnerable employment condition, especially those in developing countries. The ILO [3] and the OECD [4] provide sector-level data on both employment and paid employees for all countries in the study. For the Rest of the World regions, we adopted a weighted average ratio of paid employees per total employment for countries in the region for three broad sectors: agriculture, industry, and services.

### (c) Gender Equality

Along with poverty eradication through decent labor conditions, gender equality and women empowerment stand as a United Nations Millennium Development Goal. Employment gap between men and women is higher in developing countries, and is an indication of limited opportunities to women in labor force. In 2007, only 49.1 per cent of women in working age were employed, against 74.3 per cent of men [15]. For the gender equality indicator, we consider the share of women in the labor market, compared to total employment. We calculate the share of female workers in each sector. The ILO [3] provide sector-level data on male and female employment for all countries in the study. For the Rest of the World regions, we adopted a weighted average distribution of men and women in total employment for countries in the region for three broad sectors: agriculture, industry, and services.

### (d) Low-Skilled Labor

Besides acting as a proxy to both educational attainment of the population and value added in production in a region, the share of low-skilled workers can also reflect the vulnerability of a sector to rapid changes in the economy. That is due to the lower diversity of knowledge and skills of low-skilled workers, who would be most affected to production offshoring to lower labor cost regions. We also consider that low-skilled labor has the potential to concentrate informal and vulnerable employment, and also most of the working poverty. We therefore assume that the worst labor conditions, such as forced and child labor, would happen primarily in low-skilled positions.

Labor inputs in the MRIO model are divided for gender and skill types. We use three skill types (low-, medium-, and high-skilled), based on occupations and educational attainment levels, as presented in Table S.1.4. For occupations, we use the definition from the *International Standard Classification of Occupations* [16] and, for educational attainment, the *International Standard Classification of Education* [17]. The ILO [3] provide sector-level data on occupations for all countries in the study. For the Rest of the World regions, we adopted a weighted average distribution of skill levels in total employment for countries in the region for three broad sectors: agriculture, industry, and services.

**Table S.1.4.** Correlation between skill types, occupations, and educational attainment levels.

| Skill Type            | Occupations <sup>a</sup>                             | Educational Attainment Levels <sup>b</sup> |
|-----------------------|------------------------------------------------------|--------------------------------------------|
| <b>Low-skilled</b>    | 9 Elementary occupations                             | 0 Less than primary education              |
|                       |                                                      | 1 Primary education                        |
|                       |                                                      | 2 Lower secondary education                |
| <b>Medium-skilled</b> | 4 Clerical support workers                           | 3 Upper secondary education                |
|                       | 5 Services and sales workers                         |                                            |
|                       | 6 Skilled agricultural, forestry and fishery workers | 4 Post-secondary                           |
|                       | 7 Craft and related trades workers                   | non-tertiary education                     |
| <b>High-skilled</b>   | 8 Plant and machine operators, and assemblers        | 5 Short-cycle tertiary education           |
|                       | 1 Managers                                           |                                            |
|                       | 2 Professionals                                      |                                            |
|                       | 3 Technicians and associate professionals            |                                            |
|                       |                                                      |                                            |
|                       |                                                      | 6 Bachelor's or equivalent level           |
|                       |                                                      | 7 Master's or equivalent level             |
|                       |                                                      | 8 Doctoral or equivalent level             |

<sup>a</sup> ISCO—2008 [16]; <sup>b</sup> ISCED—2011 [17].

#### (e) Child and Forced Labor

Three types of labor were calculated for as indicators for the worst labor conditions: child labor, children in hazardous labor, and forced labor. The following definitions used for each type of labor were given by the ILO [18,19] and the U.S. Department of Labor [20]:

- *Child labor*: is a part of children in employment, and it refers to work done by children who are younger than the designated minimum age—usually 13 for light work and 15 for ordinary work. It also includes all children under 18 involved in the worst forms of child labor: (a) all forms of slavery or practices similar to slavery, such as the sale or trafficking of children, debt bondage and serfdom, or forced or compulsory labor, including forced or compulsory recruitment of children for use in armed conflict; (b) the use, procuring or offering of a child for prostitution, for the production of pornography or for pornographic purposes; (c) the use, procuring or offering of a child for illicit activities in particular for the production and trafficking of drugs; and (d) hazardous work.
- *Children in hazardous labor*: Is often treated as a proxy category of the worst forms of child labor. It includes any activity or occupation that, by its nature or type, has or leads to adverse effects on the child's safety, health, and moral development: (a) work that exposes children to physical, emotional or sexual abuse; (b) work underground, under water, at dangerous heights or in confined spaces; (c) work with dangerous machinery, equipment and tools, or that involves the manual handling or transport of heavy loads; (d) work in unhealthy environment, which may, for example, expose children to hazardous substances, agents of processes or to temperatures, noise levels, or vibrations damaging their health; and (e) work under particularly difficult conditions such as work for long hours or during the night, or work that does not allow for the possibility of returning home each day.
- *Forced labor*: all work or service which is obtained from any person under the menace of any penalty for its nonperformance and for which the worker does not offer himself voluntarily, and includes debt bondage. It involves work provided or obtained by force, fraud or coercion,

including: (a) by threats of serious harm to, or physical restraint against any person; (b) by means of any scheme, plan or pattern intended to cause the person to believe that, if the person did not perform such labor or services, that person or another person would suffer serious harm or physical restraint; or (c) by means of the abuse or threatened abuse of law or the legal process. We only account for forced labor exploitation in economic activities by individuals or enterprises, and exclude sexual exploitation and state-imposed forms of forced labor (e.g., forced prison work or work imposed by the state military or by rebel armed forces).

Data on number of persons involved and distribution of these labor types were collected from ILO [19,21]. Data was available for total number of workers involved, general sectorial disaggregation, and regional distribution. Data was disaggregated from ILO regions (Table S.1.5) into the study regions and sectors. We stress that those three forms of worst labor conditions are not exclusive. Some child labor—especially the hazardous type—can also be contained in forced labor, and *vice versa*.

**Table S.1.5.** Correspondence of regions in ILO statistics and in the study.

| ILO Regions—Forced Labor                             | ILO Regions—Child Labor         | Study Regions                   |
|------------------------------------------------------|---------------------------------|---------------------------------|
| Asia and Pacific                                     | Asia and Pacific                | Asia and the Pacific            |
| Latin America and the Caribbean                      | Latin America and the Caribbean | Latin America and the Caribbean |
| Africa                                               | Sub-Saharan Africa              | Africa                          |
| Middle East                                          |                                 | Middle East                     |
| Central and South-Eastern Europe<br>(non-EU) and CIS | Other regions                   | Other Europe                    |
| Developed economies and the EU                       |                                 | Europe OECD                     |
|                                                      |                                 | North America                   |

#### S.1.1.2. Allocation and Trade-Linking

All the data collected was, when necessary, disaggregated into the full MRIO detail in order to perform the modeling. The footprints were calculated with the disaggregated EXIOBASE model. Results were then re-aggregated into the seven regions and eight consumption categories of the study.

The first round of allocation was for the disaggregation from original data into 163 economic sectors in the MRIO inside the original data regions, and then into the study regions. The allocation in the sectors was done based on total employment, in the case of occupational health, and on low-skilled labor, in the case of child and forced labor (Equation (4)). Indicators were then disaggregated into the MRIO regions according to share of total employment/low-skilled employment in each country relative to the original data region (Equation (5)). Low-skilled labor, women share in labor, and vulnerable employment weren't allocated in the first round, since they were already collected in the same classification as the MRIO original sectors and regions.

$$BL_i^{r*} = BL_{i*}^{r*} \times \frac{L_i^{r*}}{\sum_{i*} L_i^{r*}} \quad (4)$$

$$BL_i^r = BL_i^{r*} \times \frac{L_i^r}{\sum_{r*} L_i^r} \quad (5)$$

where:



**Figure S.2.2.** Contribution of each consumption category to total and to bad labor footprints in the Middle East. Dark bars represent contributions of more than 10%.

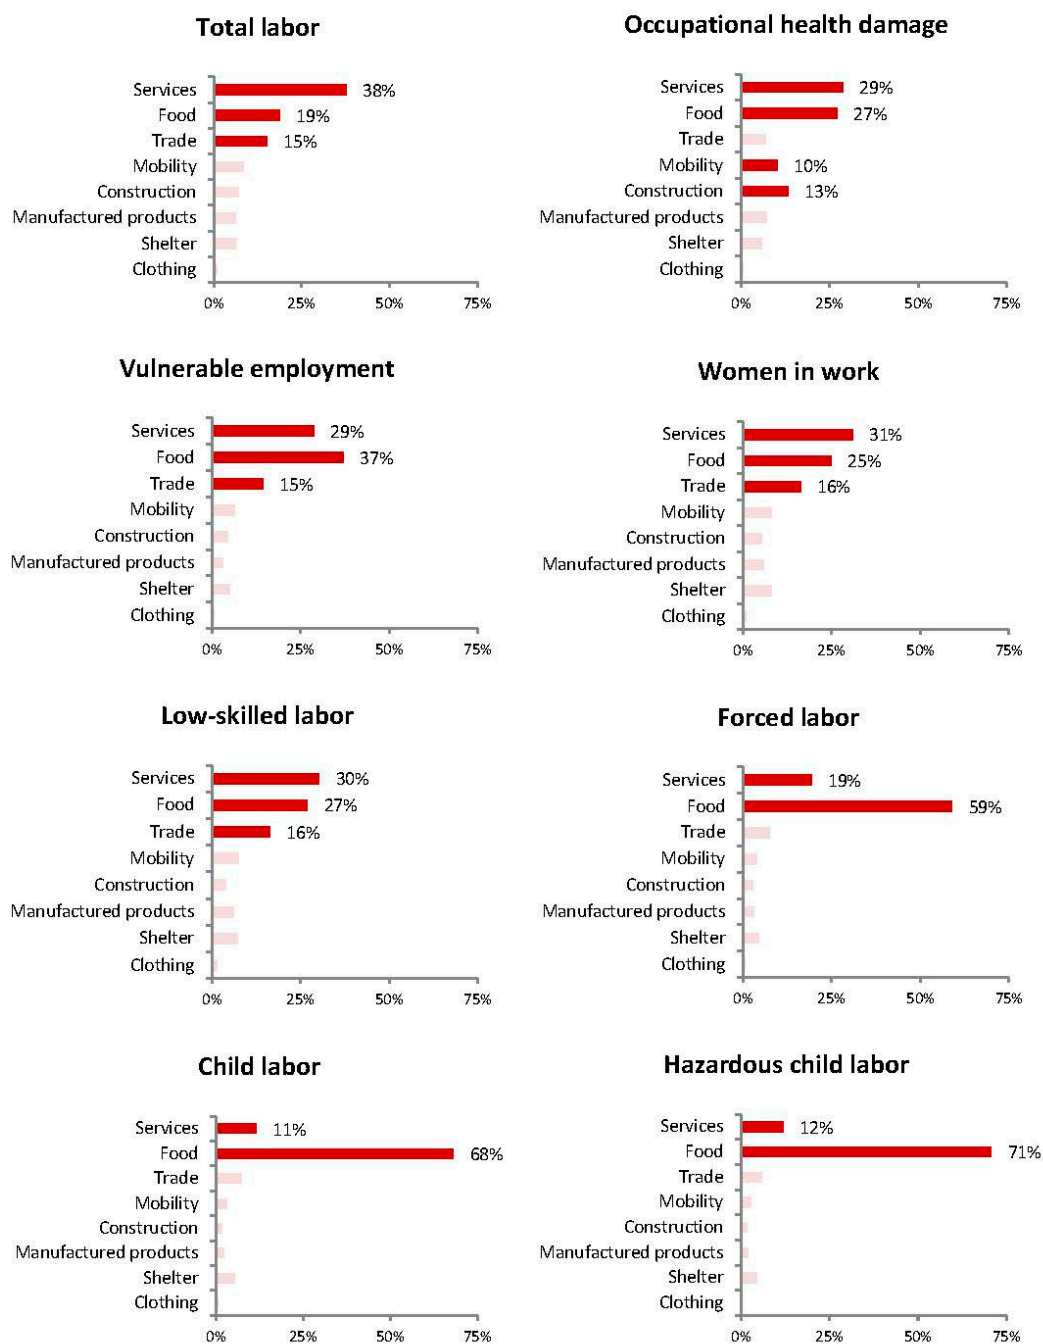

**Figure S.2.3.** Contribution of each consumption category to total and to bad labor footprints in OECD Europe. Dark bars represent contributions of more than 10%.

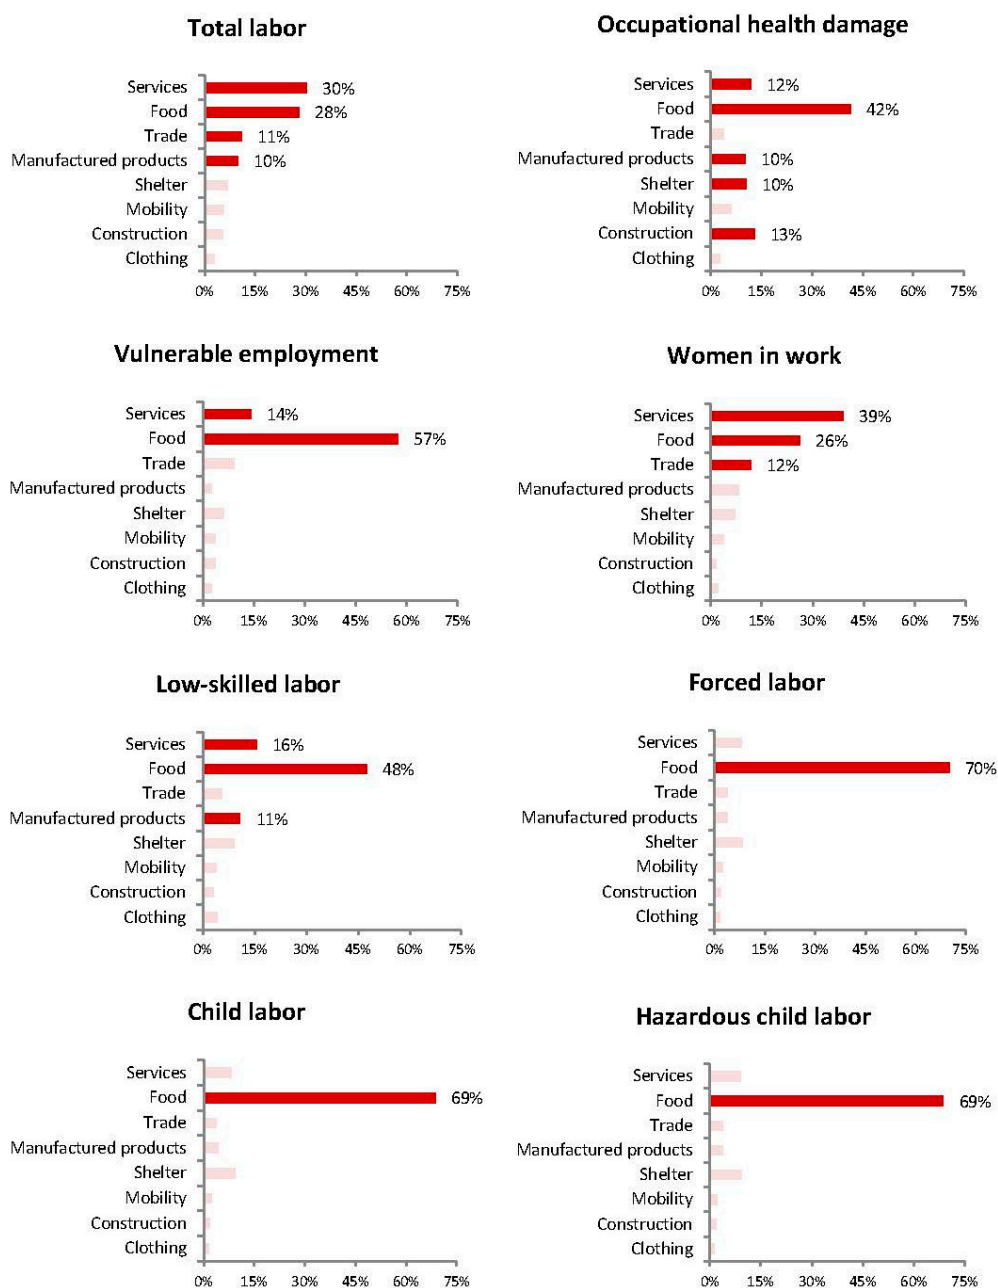

**Figure S.2.4.** Contribution of each consumption category to total and to bad labor footprints in non-OECD Europe. Dark bars represent contributions of more than 10%.

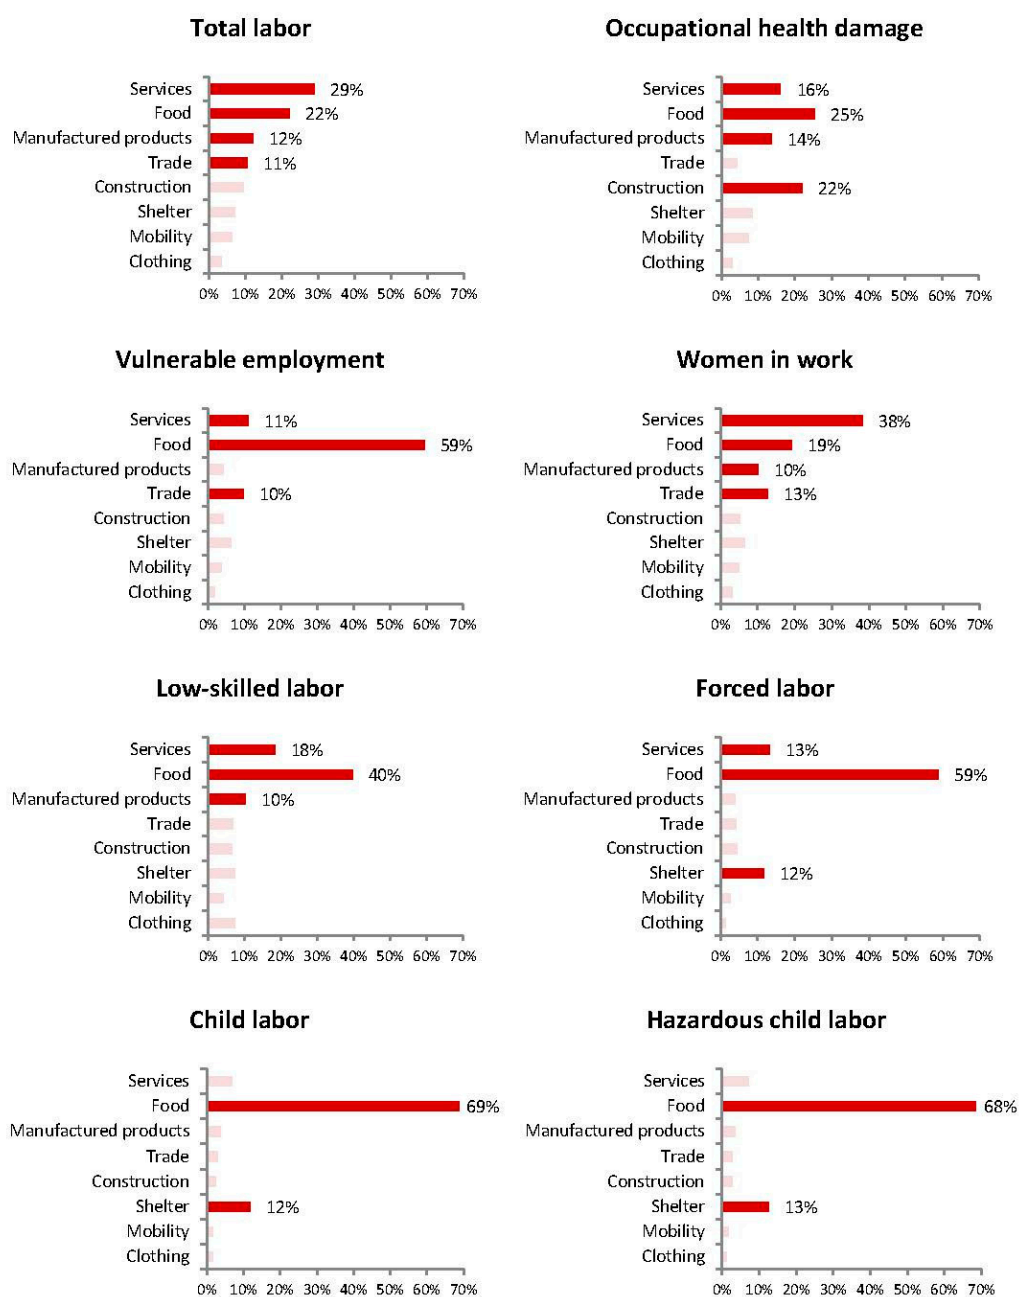

**Figure S.2.5.** Contribution of each consumption category to total and to bad labor footprints in Asia and the Pacific. Dark bars represent contributions of more than 10%.

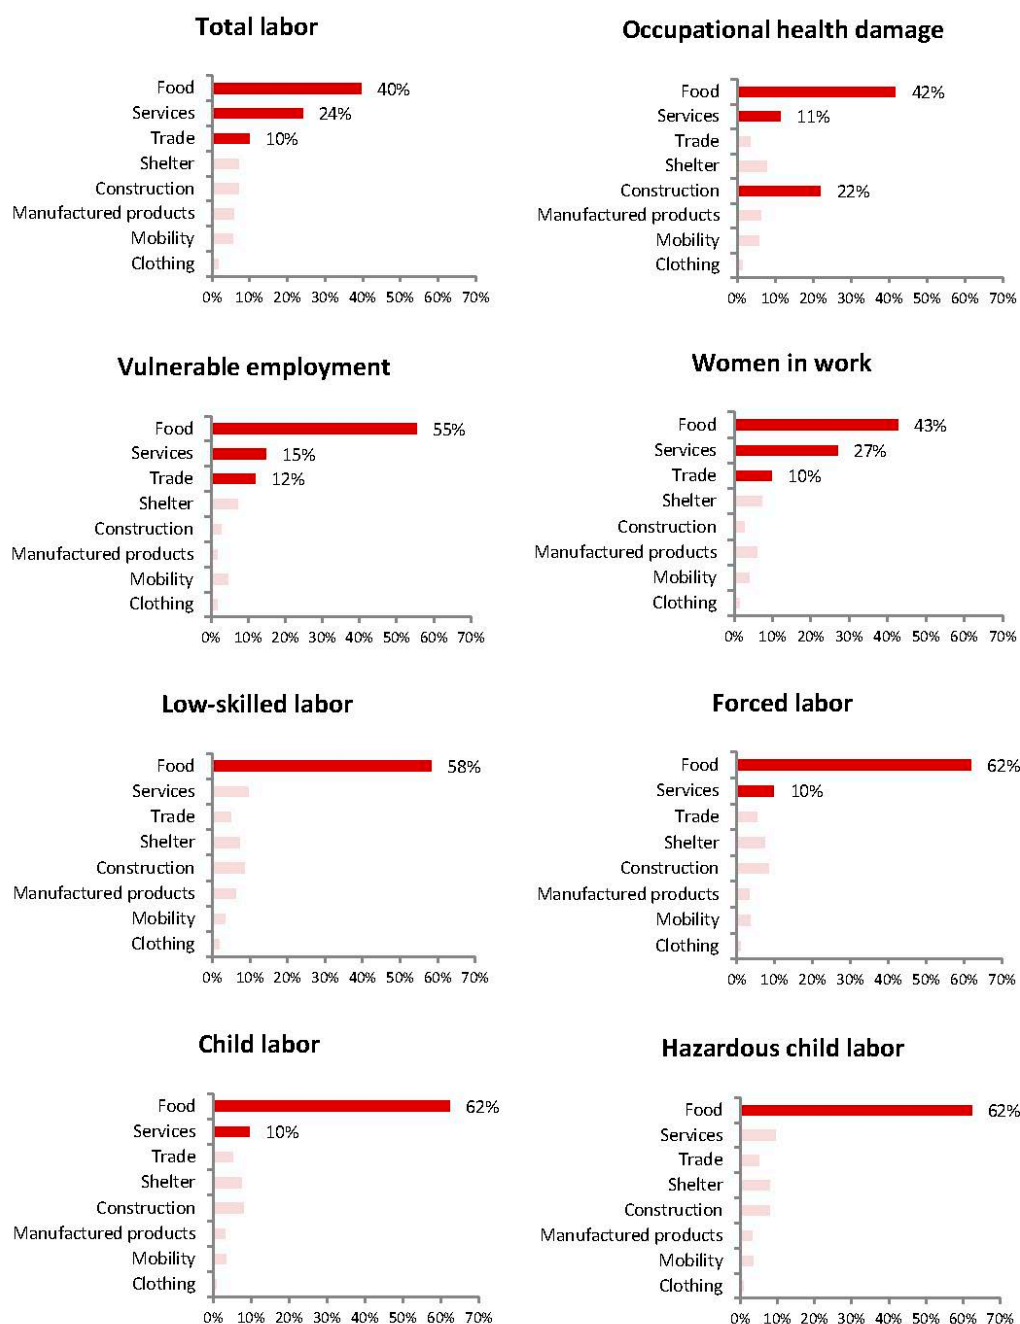



**Figure S.2.6.** Contribution of each consumption category to total and to bad labor footprints in North America. Dark bars represent contributions of more than 10%.

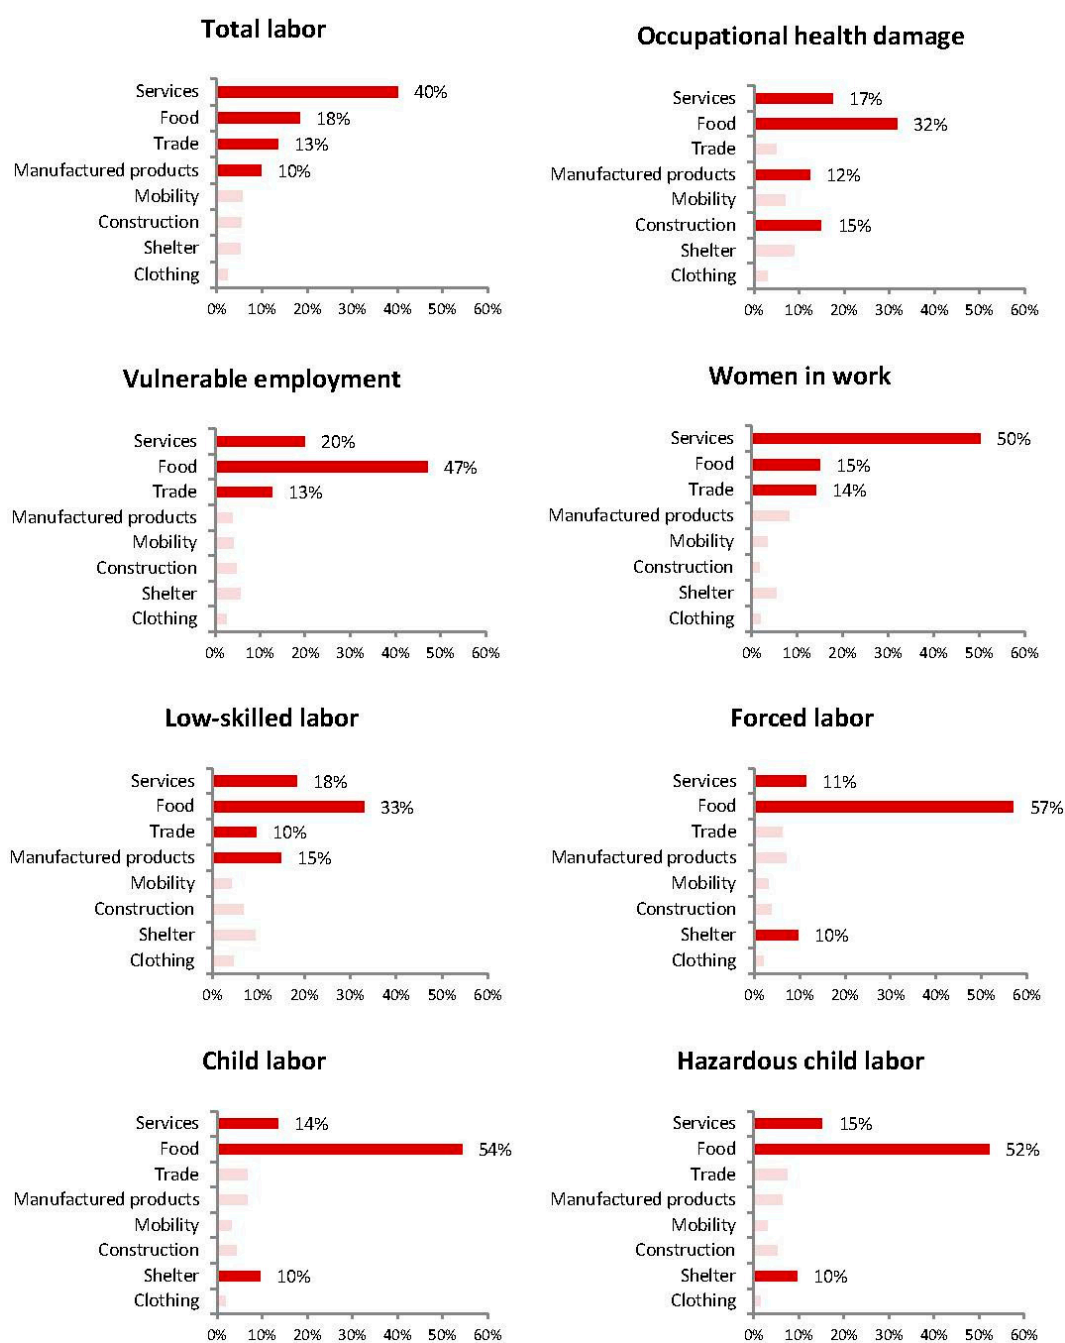

**Figure S.2.7.** Contribution of each consumption category to total and to bad labor footprints in Latin America and the Caribbean. Dark bars represent contributions of more than 10%.

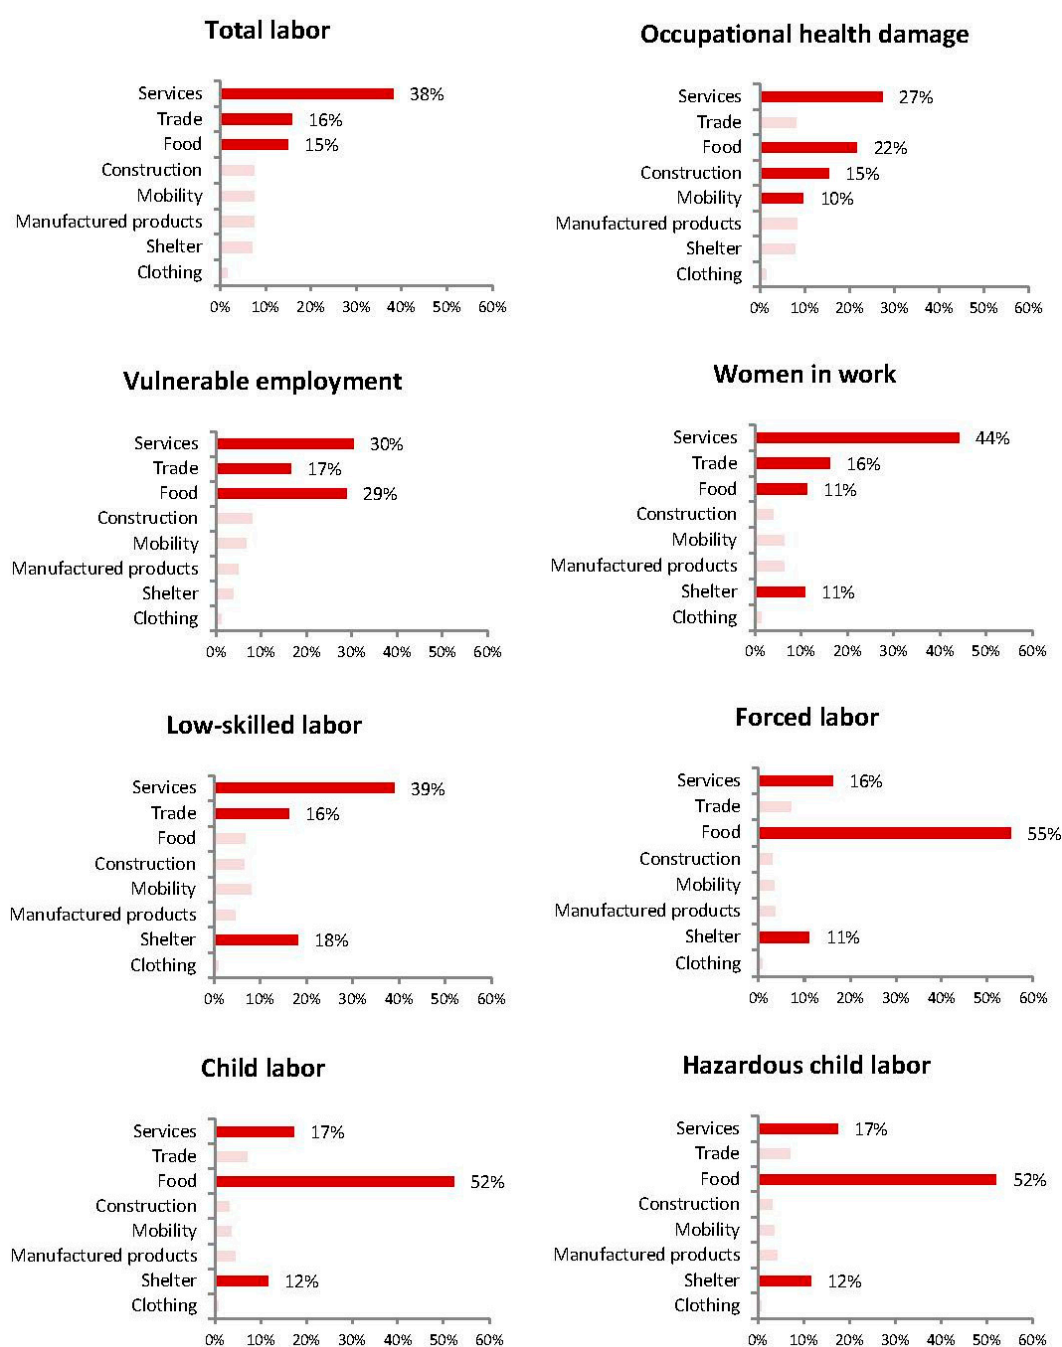

Tables S.2.1 and S.2.2 rank the bad labor footprints for regions and consumption categories for absolute footprints and for relative footprints (per 1000 p-yeq), respectively.

Table S.2.3 show gross flows of bad labor embodied in traded products between regions.

**Table S.2.1.** Absolute footprints for each sector and region ranked from higher to lower.

| Total Employment |     |       |         | Vulnerable Employment |       |         | Low-Skilled Labor |       |         | Occupational Health |       |       | Child Labor |       |        | Hazardous Child Labor |       |        | Forced Labor |       |       |
|------------------|-----|-------|---------|-----------------------|-------|---------|-------------------|-------|---------|---------------------|-------|-------|-------------|-------|--------|-----------------------|-------|--------|--------------|-------|-------|
|                  | Reg | Cat   | Value   | Reg                   | Cat   | Value   | Reg               | Cat   | Value   | Reg                 | Cat   | Value | Reg         | Cat   | Value  | Reg                   | Cat   | Value  | Reg          | Cat   | Value |
| 1                | AP  | Food  | 649,667 | AP                    | Food  | 298,121 | AP                | Food  | 448,848 | AP                  | Food  | 6441  | AP          | Food  | 60,095 | AP                    | Food  | 26,029 | AP           | Food  | 4206  |
| 2                | AP  | Serv  | 393,853 | Af                    | Food  | 109,352 | AP                | Serv  | 72,596  | AP                  | Cons  | 3400  | Af          | Food  | 25,574 | Af                    | Food  | 15,216 | EU           | Food  | 1276  |
| 3                | AP  | Trade | 161,805 | AP                    | Serv  | 79,946  | AP                | Cons  | 66,315  | Af                  | Food  | 2409  | EU          | Food  | 18,213 | EU                    | Food  | 11,542 | Af           | Food  | 996   |
| 4                | NA  | Serv  | 136,175 | EU                    | Food  | 77,790  | AP                | Shelt | 55,813  | AP                  | Serv  | 1761  | AP          | Serv  | 9185   | Af                    | Serv  | 4844   | AP           | Serv  | 667   |
| 5                | EU  | Serv  | 133,640 | AP                    | Trade | 63,862  | Af                | Food  | 52,695  | EU                  | Food  | 1503  | Af          | Serv  | 8136   | NA                    | Food  | 4315   | AP           | Cons  | 566   |
| 6                | Af  | Food  | 133,508 | AP                    | Shelt | 39,063  | EU                | Food  | 49,703  | AP                  | Shelt | 1215  | AP          | Cons  | 7845   | OE                    | Food  | 4080   | OE           | Food  | 527   |
| 7                | EU  | Food  | 124,396 | NA                    | Food  | 36,416  | AP                | Man   | 47,195  | AP                  | Man   | 977   | AP          | Shelt | 7268   | AP                    | Serv  | 3943   | NA           | Food  | 514   |
| 8                | AP  | Shelt | 115,829 | AP                    | Mob   | 25,053  | AP                | Trade | 37,913  | AP                  | Mob   | 877   | NA          | Food  | 7133   | AP                    | Cons  | 3342   | AP           | Shelt | 509   |
| 9                | AP  | Cons  | 114,089 | LA                    | Serv  | 19,454  | AP                | Mob   | 26,586  | NA                  | Food  | 680   | OE          | Food  | 5520   | LA                    | Food  | 3312   | LA           | Food  | 401   |
| 10               | AP  | Man   | 93,697  | EU                    | Serv  | 19,131  | NA                | Food  | 22,905  | AP                  | Trade | 546   | LA          | Food  | 5028   | AP                    | Shelt | 3249   | AP           | Trade | 356   |
| 11               | AP  | Mob   | 89,781  | Af                    | Serv  | 18,570  | EU                | Serv  | 16,260  | Af                  | Serv  | 526   | AP          | Trade | 4943   | AP                    | Trade | 2146   | Af           | Serv  | 316   |
| 12               | LA  | Serv  | 74,029  | LA                    | Food  | 18,493  | LA                | Serv  | 14,389  | EU                  | Cons  | 467   | Af          | Trade | 3431   | Af                    | Trade | 2041   | AP           | Mob   | 237   |
| 13               | NA  | Food  | 62,764  | OE                    | Food  | 16,476  | AP                | Cloth | 13,511  | LA                  | Serv  | 436   | AP          | Mob   | 3322   | ME                    | Food  | 1606   | AP           | Man   | 219   |
| 14               | Af  | Serv  | 58,438  | NA                    | Serv  | 15,385  | NA                | Serv  | 12,704  | EU                  | Serv  | 434   | AP          | Man   | 2933   | EU                    | Shelt | 1550   | ME           | Food  | 195   |
| 15               | EU  | Trade | 49,009  | AP                    | Cons  | 14,980  | EU                | Man   | 11,379  | OE                  | Food  | 389   | EU          | Shelt | 2461   | EU                    | Serv  | 1529   | EU           | Shelt | 153   |
| 16               | NA  | Trade | 45,953  | EU                    | Trade | 12,639  | Af                | Serv  | 10,596  | EU                  | Shelt | 378   | EU          | Serv  | 2183   | AP                    | Mob   | 1436   | EU           | Serv  | 148   |
| 17               | EU  | Man   | 43,572  | LA                    | Trade | 10,613  | NA                | Man   | 10,371  | NA                  | Serv  | 372   | ME          | Food  | 2071   | AP                    | Man   | 1282   | Af           | Trade | 134   |
| 18               | OE  | Serv  | 40,652  | NA                    | Trade | 9743    | OE                | Food  | 10,133  | EU                  | Man   | 371   | NA          | Serv  | 1783   | NA                    | Serv  | 1254   | OE           | Serv  | 119   |
| 19               | NA  | Man   | 33,025  | AP                    | Man   | 9155    | EU                | Shelt | 9663    | LA                  | Food  | 346   | Af          | Mob   | 1746   | LA                    | Serv  | 1103   | LA           | Serv  | 117   |
| 20               | OE  | Food  | 31,021  | ME                    | Food  | 9057    | LA                | Shelt | 6706    | OE                  | Cons  | 340   | LA          | Serv  | 1661   | Af                    | Mob   | 1035   | OE           | Shelt | 105   |
| 21               | LA  | Trade | 30,582  | AP                    | Cloth | 8880    | NA                | Trade | 6627    | NA                  | Cons  | 319   | Af          | Man   | 1505   | Af                    | Cons  | 895    | NA           | Serv  | 102   |
| 22               | EU  | Shelt | 30,031  | EU                    | Shelt | 8501    | NA                | Shelt | 6467    | NA                  | Man   | 265   | Af          | Cons  | 1504   | Af                    | Man   | 895    | NA           | Shelt | 87    |
| 23               | LA  | Food  | 29,080  | Af                    | Trade | 8179    | LA                | Trade | 5976    | Af                  | Cons  | 258   | NA          | Shelt | 1256   | NA                    | Shelt | 788    | LA           | Shelt | 81    |
| 24               | EU  | Mob   | 25,515  | ME                    | Serv  | 7034    | EU                | Trade | 5750    | OE                  | Serv  | 248   | EU          | Man   | 1120   | OE                    | Shelt | 753    | EU           | Man   | 72    |
| 25               | AP  | Cloth | 25,059  | LA                    | Cons  | 5054    | Af                | Trade | 4727    | LA                  | Cons  | 246   | LA          | Shelt | 1117   | LA                    | Shelt | 738    | Af           | Mob   | 69    |
| 26               | ME  | Serv  | 24,298  | EU                    | Cons  | 4918    | OE                | Serv  | 4669    | AP                  | Cloth | 228   | EU          | Trade | 1006   | EU                    | Man   | 648    | EU           | Trade | 67    |
| 27               | Af  | Trade | 24,269  | EU                    | Mob   | 4915    | NA                | Cons  | 4608    | EU                  | Mob   | 223   | Af          | Shelt | 953    | EU                    | Trade | 619    | ME           | Serv  | 64    |
| 28               | EU  | Cons  | 23,584  | LA                    | Mob   | 4306    | EU                | Cloth | 4496    | OE                  | Man   | 211   | OE          | Shelt | 948    | NA                    | Trade | 609    | NA           | Man   | 63    |
| 29               | NA  | Mob   | 18,806  | NA                    | Shelt | 4280    | EU                | Mob   | 4081    | Af                  | Mob   | 201   | NA          | Man   | 884    | Af                    | Shelt | 565    | AP           | Cloth | 63    |

Table S.2.1. Cont.

| Total Employment |     |       |        | Vulnerable Employment |       |       | Low-Skilled Labor |       |       | Occupational Health |       |       | Child Labor |       |       | Hazardous Child Labor |       |       | Forced Labor |       |       |
|------------------|-----|-------|--------|-----------------------|-------|-------|-------------------|-------|-------|---------------------|-------|-------|-------------|-------|-------|-----------------------|-------|-------|--------------|-------|-------|
|                  | Reg | Cat   | Value  | Reg                   | Cat   | Value | Reg               | Cat   | Value | Reg                 | Cat   | Value | Reg         | Cat   | Value | Reg                   | Cat   | Value | Reg          | Cat   | Value |
| 30               | NA  | Cons  | 18,275 | Af                    | Mob   | 4260  | EU                | Cons  | 3286  | ME                  | Serv  | 200   | NA          | Trade | 875   | NA                    | Man   | 514   | Af           | Man   | 59    |
| 31               | NA  | Shelt | 17,772 | EU                    | Man   | 3729  | NA                | Cloth | 3107  | NA                  | Shelt | 190   | AP          | Cloth | 846   | LA                    | Trade | 452   | Af           | Cons  | 58    |
| 32               | OE  | Man   | 16,947 | EU                    | Cloth | 3679  | ME                | Serv  | 2983  | ME                  | Food  | 189   | LA          | Trade | 681   | OE                    | Serv  | 430   | NA           | Trade | 55    |
| 33               | OE  | Trade | 14,741 | NA                    | Cons  | 3619  | LA                | Mob   | 2957  | Af                  | Man   | 156   | EU          | Mob   | 653   | NA                    | Cons  | 426   | LA           | Trade | 52    |
| 34               | LA  | Cons  | 14,521 | ME                    | Trade | 3547  | NA                | Mob   | 2853  | LA                  | Mob   | 155   | OE          | Serv  | 555   | EU                    | Mob   | 373   | EU           | Mob   | 44    |
| 35               | LA  | Mob   | 14,350 | Af                    | Cons  | 3310  | ME                | Food  | 2656  | Af                  | Trade | 154   | NA          | Cons  | 553   | AP                    | Cloth | 363   | OE           | Cons  | 39    |
| 36               | LA  | Man   | 14,302 | NA                    | Mob   | 3155  | OE                | Man   | 2618  | NA                  | Mob   | 146   | EU          | Cons  | 484   | EU                    | Cons  | 334   | OE           | Trade | 39    |
| 37               | LA  | Shelt | 13,651 | LA                    | Man   | 3113  | Af                | Mob   | 2475  | EU                  | Trade | 139   | NA          | Mob   | 429   | ME                    | Serv  | 271   | Af           | Shelt | 38    |
| 38               | OE  | Cons  | 13,177 | OE                    | Serv  | 3031  | LA                | Food  | 2440  | LA                  | Man   | 131   | LA          | Man   | 417   | LA                    | Man   | 269   | EU           | Cons  | 35    |
| 39               | Af  | Mob   | 12,999 | NA                    | Man   | 2896  | LA                | Cons  | 2408  | OE                  | Shelt | 129   | EU          | Cloth | 405   | NA                    | Mob   | 248   | OE           | Man   | 34    |
| 40               | Af  | Cons  | 12,773 | OE                    | Trade | 2655  | OE                | Cloth | 1862  | LA                  | Trade | 129   | LA          | Mob   | 351   | LA                    | Mob   | 230   | NA           | Cons  | 34    |
| 41               | EU  | Cloth | 12,394 | Af                    | Man   | 2551  | Af                | Cons  | 1849  | LA                  | Shelt | 125   | ME          | Serv  | 348   | OE                    | Man   | 215   | EU           | Cloth | 29    |
| 42               | ME  | Food  | 12,043 | LA                    | Shelt | 2459  | OE                | Shelt | 1831  | OE                  | Mob   | 114   | LA          | Cons  | 297   | EU                    | Cloth | 212   | NA           | Mob   | 27    |
| 43               | Af  | Man   | 11,386 | Af                    | Shelt | 2455  | OE                | Trade | 1737  | NA                  | Trade | 104   | OE          | Man   | 295   | LA                    | Cons  | 197   | LA           | Man   | 26    |
| 44               | OE  | Shelt | 9970   | NA                    | Cloth | 1944  | Af                | Man   | 1711  | EU                  | Cloth | 101   | NA          | Cloth | 235   | OE                    | Trade | 164   | LA           | Mob   | 25    |
| 45               | ME  | Trade | 9797   | OE                    | Shelt | 1760  | LA                | Man   | 1697  | Af                  | Shelt | 94    | OE          | Trade | 231   | OE                    | Cons  | 159   | ME           | Trade | 25    |
| 46               | OE  | Mob   | 9011   | ME                    | Mob   | 1584  | OE                | Cons  | 1651  | Af                  | Cons  | 93    | ME          | Trade | 223   | ME                    | Trade | 135   | OE           | Mob   | 23    |
| 47               | NA  | Cloth | 7827   | ME                    | Shelt | 1258  | ME                | Trade | 1611  | ME                  | Mob   | 71    | OE          | Cons  | 203   | NA                    | Cloth | 123   | LA           | Cons  | 21    |
| 48               | Af  | Shelt | 6616   | OE                    | Cons  | 1178  | Af                | Shelt | 1533  | OE                  | Trade | 63    | Af          | Cloth | 167   | ME                    | Shelt | 103   | NA           | Cloth | 19    |
| 49               | ME  | Mob   | 5435   | OE                    | Man   | 1173  | OE                | Mob   | 1087  | NA                  | Cloth | 62    | ME          | Shelt | 165   | Af                    | Cloth | 99    | ME           | Shelt | 15    |
| 50               | OE  | Cloth | 4619   | Af                    | Cons  | 1082  | ME                | Mob   | 740   | ME                  | Man   | 51    | OE          | Mob   | 139   | OE                    | Mob   | 95    | ME           | Mob   | 13    |
| 51               | Af  | Cons  | 4604   | OE                    | Mob   | 1016  | ME                | Shelt | 726   | ME                  | Trade | 48    | OE          | Cloth | 135   | OE                    | Cloth | 70    | OE           | Cloth | 11    |
| 52               | ME  | Man   | 3999   | LA                    | Cloth | 770   | ME                | Man   | 608   | OE                  | Cloth | 45    | ME          | Mob   | 94    | ME                    | Mob   | 61    | ME           | Man   | 10    |
| 53               | ME  | Shelt | 3967   | ME                    | Man   | 754   | Af                | Cons  | 391   | ME                  | Shelt | 40    | LA          | Cloth | 80    | LA                    | Cloth | 51    | Af           | Cons  | 9     |
| 54               | LA  | Cloth | 3135   | Af                    | Cloth | 471   | Af                | Cloth | 336   | LA                  | Cloth | 23    | ME          | Man   | 70    | ME                    | Man   | 47    | Af           | Cloth | 7     |
| 55               | Af  | Cloth | 1252   | OE                    | Cloth | 470   | LA                | Cloth | 313   | Af                  | Cloth | 15    | Af          | Cons  | 52    | Af                    | Cons  | 40    | LA           | Cloth | 5     |
| 56               | ME  | Cloth | 487    | ME                    | Cloth | 127   | ME                | Cloth | 143   | ME                  | Cloth | 5     | ME          | Cloth | 15    | ME                    | Cloth | 9     | ME           | Cloth | 1     |

UNITS: Total employment, vulnerable employment, low-skilled labor, child labor, hazardous child labor, forced labor = 1000 p-yeq; Occupational health = 1000 DALYs.

Regions (Reg): Af = Africa; AP = Asia and the Pacific; EU = Europe OECD; LA = Latin America and the Caribbean; ME = Middle East; NA = North America; OE = Other Europe. Categories (Cat): Cloth = Clothing; Cons = Construction; Man = Manufactured products; Mob = Mobility; Serv = Services; Shelt = Shelter.

**Table S.2.2.** Bad labor share of total labor footprints for each sector and region ranked from higher to lower.

| Vulnerable Employment |     |       |       | Low-Skilled Labor |       |       | Gender Inequality |       |       | Occupational Health |       |       | Child Labor |       |       | Hazardous Child Labor |       |       | Forced Labor |       |       |
|-----------------------|-----|-------|-------|-------------------|-------|-------|-------------------|-------|-------|---------------------|-------|-------|-------------|-------|-------|-----------------------|-------|-------|--------------|-------|-------|
|                       | Reg | Cat   | Value | Reg               | Cat   | Value | Reg               | Cat   | Value | Reg                 | Cat   | Value | Reg         | Cat   | Value | Reg                   | Cat   | Value | Reg          | Cat   | Value |
| 1                     | Af  | Food  | 819   | AP                | Food  | 691   | NA                | Cons  | 123   | AP                  | Cons  | 29.8  | Af          | Food  | 192   | ME                    | Food  | 133   | OE           | Food  | 17.0  |
| 2                     | ME  | Food  | 752   | AP                | Cons  | 581   | EU                | Cons  | 129   | OE                  | Cons  | 25.8  | OE          | Food  | 178   | OE                    | Food  | 132   | ME           | Food  | 16.2  |
| 3                     | LA  | Food  | 636   | AP                | Cloth | 539   | AP                | Cons  | 135   | Af                  | Cons  | 20.3  | LA          | Food  | 173   | Af                    | Food  | 114   | LA           | Food  | 13.8  |
| 4                     | EU  | Food  | 625   | AP                | Man   | 504   | Af                | Cons  | 196   | Af                  | Cons  | 20.2  | ME          | Food  | 172   | LA                    | Food  | 114   | OE           | Shelt | 10.5  |
| 5                     | NA  | Food  | 580   | LA                | Shelt | 491   | ME                | Serv  | 218   | EU                  | Cons  | 19.8  | EU          | Food  | 146   | EU                    | Food  | 93    | EU           | Food  | 10.3  |
| 6                     | OE  | Food  | 531   | AP                | Shelt | 482   | LA                | Cons  | 218   | Af                  | Food  | 18.0  | Af          | Shelt | 144   | Af                    | Shelt | 85    | NA           | Food  | 8.2   |
| 7                     | AP  | Food  | 459   | OE                | Cloth | 403   | OE                | Cons  | 245   | NA                  | Cons  | 17.5  | Af          | Trade | 141   | Af                    | Trade | 84    | Af           | Food  | 7.5   |
| 8                     | AP  | Trade | 395   | EU                | Food  | 400   | ME                | Man   | 249   | LA                  | Cons  | 16.9  | Af          | Serv  | 139   | Af                    | Serv  | 83    | AP           | Food  | 6.5   |
| 9                     | Af  | Cloth | 376   | NA                | Cloth | 397   | ME                | Mob   | 250   | ME                  | Food  | 15.7  | Af          | Mob   | 134   | Af                    | Mob   | 80    | LA           | Shelt | 5.9   |
| 10                    | Af  | Shelt | 371   | Af                | Food  | 395   | AP                | Mob   | 259   | Af                  | Mob   | 15.5  | Af          | Cloth | 134   | Af                    | Cloth | 79    | Af           | Shelt | 5.7   |
| 11                    | ME  | Trade | 362   | NA                | Food  | 365   | NA                | Mob   | 267   | Af                  | Shelt | 14.2  | Af          | Man   | 132   | Af                    | Man   | 79    | Af           | Trade | 5.5   |
| 12                    | AP  | Cloth | 354   | NA                | Shelt | 364   | EU                | Mob   | 270   | Af                  | Man   | 13.7  | Af          | Cons  | 118   | OE                    | Shelt | 76    | Af           | Cloth | 5.4   |
| 13                    | LA  | Cons  | 348   | EU                | Cloth | 363   | ME                | Trade | 284   | ME                  | Mob   | 13.1  | NA          | Food  | 114   | Af                    | Cons  | 70    | Af           | Serv  | 5.4   |
| 14                    | LA  | Trade | 347   | OE                | Food  | 327   | ME                | Cloth | 293   | OE                  | Shelt | 13.0  | OE          | Shelt | 95    | NA                    | Food  | 69    | Af           | Mob   | 5.3   |
| 15                    | AP  | Shelt | 337   | EU                | Shelt | 322   | EU                | Cloth | 308   | OE                  | Mob   | 12.7  | AP          | Food  | 93    | LA                    | Shelt | 54    | Af           | Man   | 5.2   |
| 16                    | Af  | Trade | 337   | NA                | Man   | 314   | AP                | Cloth | 313   | ME                  | Man   | 12.7  | EU          | Shelt | 82    | EU                    | Shelt | 52    | EU           | Shelt | 5.1   |
| 17                    | Af  | Mob   | 328   | AP                | Mob   | 296   | LA                | Food  | 313   | EU                  | Shelt | 12.6  | LA          | Shelt | 82    | NA                    | Shelt | 44    | AP           | Cons  | 5.0   |
| 18                    | Af  | Serv  | 318   | ME                | Cloth | 293   | Af                | Mob   | 319   | OE                  | Food  | 12.6  | NA          | Shelt | 71    | AP                    | Food  | 40    | NA           | Shelt | 4.9   |
| 19                    | ME  | Shelt | 317   | Af                | Cloth | 269   | OE                | Mob   | 334   | OE                  | Man   | 12.5  | AP          | Cons  | 69    | AP                    | Cons  | 29    | Af           | Cons  | 4.6   |
| 20                    | LA  | Mob   | 300   | EU                | Man   | 261   | NA                | Food  | 341   | Af                  | Cloth | 12.3  | AP          | Shelt | 63    | AP                    | Shelt | 28    | AP           | Shelt | 4.4   |
| 21                    | EU  | Cloth | 297   | NA                | Cons  | 252   | EU                | Man   | 343   | EU                  | Food  | 12.1  | ME          | Shelt | 41    | ME                    | Shelt | 26    | ME           | Shelt | 3.7   |
| 22                    | ME  | Mob   | 291   | AP                | Trade | 234   | Af                | Serv  | 345   | LA                  | Food  | 11.9  | AP          | Mob   | 37    | NA                    | Cons  | 23    | ME           | Cloth | 3.0   |
| 23                    | ME  | Serv  | 290   | Af                | Shelt | 232   | Af                | Trade | 350   | NA                  | Food  | 10.8  | AP          | Cloth | 34    | LA                    | Man   | 19    | OE           | Cons  | 3.0   |
| 24                    | EU  | Shelt | 283   | ME                | Food  | 221   | NA                | Cloth | 350   | LA                  | Mob   | 10.8  | EU          | Cloth | 33    | ME                    | Cloth | 18    | OE           | Serv  | 2.9   |
| 25                    | AP  | Mob   | 279   | LA                | Mob   | 206   | ME                | Shelt | 350   | NA                  | Shelt | 10.7  | AP          | Man   | 31    | EU                    | Cloth | 17    | AP           | Mob   | 2.6   |
| 26                    | LA  | Serv  | 263   | LA                | Trade | 195   | ME                | Food  | 355   | AP                  | Shelt | 10.5  | AP          | Trade | 31    | LA                    | Cloth | 16    | ME           | Serv  | 2.6   |
| 27                    | ME  | Cloth | 260   | Af                | Trade | 195   | LA                | Mob   | 356   | AP                  | Man   | 10.4  | NA          | Cons  | 30    | LA                    | Mob   | 16    | OE           | Trade | 2.6   |
| 28                    | Af  | Cons  | 259   | LA                | Serv  | 194   | NA                | Man   | 357   | ME                  | Cloth | 10.1  | NA          | Cloth | 30    | AP                    | Mob   | 16    | OE           | Mob   | 2.6   |
| 29                    | EU  | Trade | 258   | Af                | Mob   | 190   | LA                | Man   | 363   | ME                  | Shelt | 10.1  | ME          | Cloth | 30    | NA                    | Cloth | 16    | AP           | Cloth | 2.5   |
| 30                    | NA  | Cloth | 248   | AP                | Serv  | 184   | OE                | Man   | 364   | AP                  | Food  | 9.9   | LA          | Man   | 29    | NA                    | Man   | 16    | ME           | Trade | 2.5   |

Table S.2.2. Cont.

| Vulnerable Employment |     |       |       | Low-Skilled Labor |       |       | Gender Inequality |       |       | Occupational Health |       |       | Child Labor |       |       | Hazardous Child Labor |       |       | Forced Labor |       |       |
|-----------------------|-----|-------|-------|-------------------|-------|-------|-------------------|-------|-------|---------------------|-------|-------|-------------|-------|-------|-----------------------|-------|-------|--------------|-------|-------|
|                       | Reg | Cat   | Value | Reg               | Cat   | Value | Reg               | Cat   | Value | Reg                 | Cat   | Value | Reg         | Cat   | Value | Reg                   | Cat   | Value | Reg          | Cat   | Value |
| 31                    | LA  | Cloth | 245   | OE                | Shelt | 184   | LA                | Cloth | 365   | AP                  | Mob   | 9.8   | OE          | Cloth | 29    | OE                    | Cloth | 15    | ME           | Man   | 2.5   |
| 32                    | NA  | Shelt | 241   | ME                | Shelt | 183   | AP                | Trade | 370   | OE                  | Cloth | 9.7   | NA          | Man   | 27    | LA                    | Serv  | 15    | OE           | Cloth | 2.4   |
| 33                    | Af  | Cons  | 235   | Af                | Serv  | 181   | Af                | Cons  | 372   | LA                  | Shelt | 9.2   | EU          | Man   | 26    | EU                    | Man   | 15    | NA           | Cloth | 2.4   |
| 34                    | Af  | Man   | 224   | LA                | Cons  | 166   | EU                | Food  | 377   | LA                  | Man   | 9.1   | EU          | Mob   | 26    | LA                    | Trade | 15    | ME           | Mob   | 2.3   |
| 35                    | LA  | Man   | 218   | ME                | Trade | 164   | AP                | Man   | 381   | AP                  | Cloth | 9.1   | LA          | Cloth | 25    | EU                    | Mob   | 15    | AP           | Man   | 2.3   |
| 36                    | NA  | Trade | 212   | EU                | Mob   | 160   | AP                | Shelt | 381   | Af                  | Serv  | 9.0   | LA          | Mob   | 24    | AP                    | Cloth | 14    | EU           | Cloth | 2.3   |
| 37                    | EU  | Cons  | 209   | OE                | Man   | 154   | OE                | Food  | 382   | EU                  | Mob   | 8.8   | AP          | Serv  | 23    | EU                    | Cons  | 14    | AP           | Trade | 2.2   |
| 38                    | AP  | Serv  | 203   | ME                | Man   | 152   | Af                | Cloth | 388   | EU                  | Man   | 8.5   | NA          | Mob   | 23    | ME                    | Trade | 14    | OE           | Man   | 2.0   |
| 39                    | NA  | Cons  | 198   | NA                | Mob   | 152   | Af                | Man   | 389   | ME                  | Serv  | 8.2   | ME          | Trade | 23    | AP                    | Man   | 14    | Af           | Cons  | 2.0   |
| 40                    | EU  | Mob   | 193   | Af                | Man   | 150   | AP                | Food  | 400   | EU                  | Cloth | 8.2   | LA          | Serv  | 22    | LA                    | Cons  | 14    | NA           | Man   | 1.9   |
| 41                    | ME  | Man   | 189   | Af                | Cons  | 145   | OE                | Shelt | 400   | NA                  | Man   | 8.0   | LA          | Trade | 22    | AP                    | Trade | 13    | NA           | Cons  | 1.9   |
| 42                    | LA  | Shelt | 180   | NA                | Trade | 144   | OE                | Cloth | 402   | NA                  | Cloth | 7.9   | EU          | Trade | 21    | NA                    | Trade | 13    | LA           | Man   | 1.8   |
| 43                    | OE  | Trade | 180   | EU                | Cons  | 139   | Af                | Food  | 409   | NA                  | Mob   | 7.8   | EU          | Cons  | 21    | NA                    | Mob   | 13    | LA           | Mob   | 1.7   |
| 44                    | OE  | Shelt | 177   | ME                | Mob   | 136   | AP                | Serv  | 417   | LA                  | Cloth | 7.3   | LA          | Cons  | 20    | OE                    | Man   | 13    | EU           | Mob   | 1.7   |
| 45                    | NA  | Mob   | 168   | OE                | Cons  | 125   | EU                | Shelt | 428   | Af                  | Trade | 6.4   | NA          | Trade | 19    | EU                    | Trade | 13    | LA           | Trade | 1.7   |
| 46                    | EU  | Serv  | 143   | ME                | Serv  | 123   | EU                | Trade | 432   | OE                  | Serv  | 6.1   | ME          | Man   | 18    | OE                    | Cons  | 12    | AP           | Serv  | 1.7   |
| 47                    | AP  | Cons  | 131   | EU                | Serv  | 122   | LA                | Trade | 432   | LA                  | Serv  | 5.9   | OE          | Man   | 17    | ME                    | Man   | 12    | EU           | Man   | 1.6   |
| 48                    | NA  | Serv  | 113   | OE                | Mob   | 121   | NA                | Shelt | 433   | ME                  | Trade | 4.9   | ME          | Mob   | 17    | EU                    | Serv  | 11    | LA           | Cloth | 1.6   |
| 49                    | OE  | Mob   | 113   | LA                | Man   | 119   | Af                | Shelt | 438   | AP                  | Serv  | 4.5   | EU          | Serv  | 16    | ME                    | Mob   | 11    | LA           | Serv  | 1.6   |
| 50                    | OE  | Cloth | 102   | OE                | Trade | 118   | NA                | Trade | 439   | OE                  | Trade | 4.3   | OE          | Trade | 16    | ME                    | Serv  | 11    | EU           | Cons  | 1.5   |
| 51                    | AP  | Man   | 98    | EU                | Trade | 117   | LA                | Serv  | 487   | LA                  | Trade | 4.2   | OE          | Mob   | 15    | OE                    | Trade | 11    | NA           | Mob   | 1.4   |
| 52                    | OE  | Cons  | 89    | OE                | Serv  | 115   | EU                | Serv  | 523   | AP                  | Trade | 3.4   | OE          | Cons  | 15    | OE                    | Serv  | 11    | LA           | Cons  | 1.4   |
| 53                    | NA  | Man   | 88    | LA                | Cloth | 100   | NA                | Serv  | 527   | EU                  | Serv  | 3.2   | ME          | Serv  | 14    | OE                    | Mob   | 11    | EU           | Trade | 1.4   |
| 54                    | EU  | Man   | 86    | NA                | Serv  | 93    | OE                | Trade | 532   | EU                  | Trade | 2.8   | OE          | Serv  | 14    | AP                    | Serv  | 10    | NA           | Trade | 1.2   |
| 55                    | OE  | Serv  | 75    | Af                | Cons  | 85    | OE                | Serv  | 578   | NA                  | Serv  | 2.7   | NA          | Serv  | 13    | NA                    | Serv  | 9     | EU           | Serv  | 1.1   |
| 56                    | OE  | Man   | 69    | LA                | Food  | 84    | LA                | Shelt | 644   | NA                  | Trade | 2.3   | Af          | Cons  | 11    | Af                    | Cons  | 9     | NA           | Serv  | 0.8   |

UNITS: Vulnerable employment, low-skilled labor, gender inequality, child labor, hazardous child labor, forced labor = p-y<sub>eq</sub> in bad labor per 1000 p-y<sub>eq</sub> in total employment; Occupational health = DALYs per 1000 p-y<sub>eq</sub> in total employment. Regions (Reg): Af = Africa; AP = Asia and the Pacific; EU = Europe OECD; LA = Latin America and the Caribbean; ME = Middle East; NA = North America; OE = Other Europe. Categories (Cat): Cloth = Clothing; Cons = Construction; Man = Manufactured products; Mob = Mobility; Serv = Services; Shelt = Shelter.

Table S.2.3. Flows of bad labor between regions.

| Total Employment (1000 p-yeq)       |         |             |             |              |                      |               |               |                  |
|-------------------------------------|---------|-------------|-------------|--------------|----------------------|---------------|---------------|------------------|
| from\to                             | Africa  | Middle East | Europe OECD | Other Europe | Asia and the Pacific | North America | Latin America | Total Production |
| Africa                              | 251,769 | 1893        | 53,902      | 5121         | 16,408               | 18,978        | 2921          | 350,992          |
| Middle East                         | 371     | 43,796      | 4939        | 937          | 5007                 | 3651          | 338           | 59,039           |
| Europe OECD                         | 1393    | 2018        | 215,504     | 4419         | 7283                 | 6106          | 2044          | 238,767          |
| Other Europe                        | 507     | 959         | 12,466      | 102,082      | 3919                 | 2068          | 2774          | 124,774          |
| Asia and the Pacific                | 5695    | 14,581      | 136,046     | 24,662       | 1,601,117            | 95,966        | 6348          | 1,884,415        |
| North America                       | 827     | 576         | 4148        | 294          | 4234                 | 202,304       | 654           | 213,036          |
| Latin America                       | 679     | 807         | 15,136      | 2623         | 5813                 | 11,525        | 178,572       | 215,155          |
| Total Consumption                   | 261,241 | 64,629      | 442,142     | 140,138      | 1,643,781            | 340,597       | 193,651       | 3,086,179        |
| Vulnerable employment (1000 p-yeq)  |         |             |             |              |                      |               |               |                  |
| from\to                             | Africa  | Middle East | Europe OECD | Other Europe | Asia and the Pacific | North America | Latin America | Total Production |
| Africa                              | 146,080 | 1208        | 37,008      | 3616         | 10,882               | 12,343        | 1758          | 212,896          |
| Middle East                         | 141     | 16,139      | 2093        | 422          | 1733                 | 1441          | 124           | 22,094           |
| Europe OECD                         | 221     | 398         | 37,600      | 844          | 1063                 | 926           | 369           | 41,421           |
| Other Europe                        | 55      | 166         | 1856        | 13,490       | 432                  | 231           | 307           | 16,537           |
| Asia and the Pacific                | 2331    | 6140        | 49,115      | 8103         | 522,032              | 32,253        | 1973          | 621,947          |
| North America                       | 64      | 74          | 527         | 33           | 598                  | 25,477        | 70            | 26,843           |
| Latin America                       | 255     | 317         | 7102        | 1250         | 2319                 | 4766          | 59,661        | 75,670           |
| Total Consumption                   | 149,147 | 24,443      | 135,302     | 27,759       | 539,060              | 77,436        | 64,262        | 1,017,409        |
| Low-skilled employment (1000 p-yeq) |         |             |             |              |                      |               |               |                  |
| from\to                             | Africa  | Middle East | Europe OECD | Other Europe | Asia and the Pacific | North America | Latin America | Total Production |
| Africa                              | 73,287  | 600         | 18,004      | 1756         | 5313                 | 6059          | 869           | 105,889          |
| Middle East                         | 37      | 4752        | 484         | 96           | 481                  | 361           | 34            | 6245             |
| Europe OECD                         | 129     | 192         | 22,947      | 412          | 686                  | 575           | 172           | 25,112           |
| Other Europe                        | 53      | 109         | 1352        | 11,455       | 426                  | 222           | 288           | 13,904           |
| Asia and the Pacific                | 2245    | 4020        | 59,859      | 11,579       | 760,666              | 38,609        | 2595          | 879,573          |
| North America                       | 81      | 63          | 436         | 32           | 452                  | 22,520        | 73            | 23,656           |
| Latin America                       | 91      | 122         | 1537        | 259          | 752                  | 1297          | 32,855        | 36,914           |
| Total Consumption                   | 75,923  | 9858        | 104,618     | 25,589       | 768,777              | 69,642        | 36,885        | 1,091,293        |
| Female work (1000 p-yeq)            |         |             |             |              |                      |               |               |                  |
| from\to                             | Africa  | Middle East | Europe OECD | Other Europe | Asia and the Pacific | North America | Latin America | Total Production |
| Africa                              | 96,518  | 763         | 21,532      | 2051         | 6527                 | 7406          | 1136          | 135,931          |
| Middle East                         | 81      | 9238        | 1142        | 221          | 1055                 | 813           | 73            | 12,623           |
| Europe OECD                         | 558     | 755         | 94,405      | 1573         | 2833                 | 2277          | 869           | 103,270          |
| Other Europe                        | 202     | 437         | 4973        | 47,234       | 1773                 | 889           | 1463          | 56,971           |
| Asia and the Pacific                | 1989    | 5373        | 50,618      | 9302         | 594,292              | 36,265        | 2385          | 700,223          |
| North America                       | 374     | 252         | 1651        | 114          | 1772                 | 91,079        | 269           | 95,512           |
| Latin America                       | 255     | 309         | 5229        | 929          | 2115                 | 4064          | 75,619        | 88,519           |
| Total Consumption                   | 99,978  | 17,127      | 179,549     | 61,423       | 610,366              | 142,793       | 81,813        | 1,193,048        |

Table S.2.3. Cont.

| Occupational Health Damage (1000 DALYs) |        |             |             |              |                      |               |               |                  |
|-----------------------------------------|--------|-------------|-------------|--------------|----------------------|---------------|---------------|------------------|
| from\to                                 | Africa | Middle East | Europe OECD | Other Europe | Asia and the Pacific | North America | Latin America | Total Production |
| Africa                                  | 3743   | 32          | 940         | 88           | 287                  | 312           | 48            | 5450             |
| Middle East                             | 6      | 542         | 77          | 14           | 81                   | 54            | 5             | 778              |
| Europe OECD                             | 5      | 7           | 1045        | 22           | 29                   | 26            | 7             | 1141             |
| Other Europe                            | 6      | 11          | 177         | 1163         | 46                   | 26            | 21            | 1449             |
| Asia and the Pacific                    | 47     | 97          | 1208        | 225          | 14,927               | 823           | 58            | 17,385           |
| North America                           | 2      | 1           | 14          | 1            | 13                   | 777           | 2             | 812              |
| Latin America                           | 7      | 7           | 155         | 27           | 61                   | 119           | 1 449         | 1824             |
| Total Consumption                       | 3814   | 697         | 3616        | 1540         | 15,444               | 2138          | 1590          | 28,838           |
| Child Labor (1000 p-yeq)                |        |             |             |              |                      |               |               |                  |
| from\to                                 | Africa | Middle East | Europe OECD | Other Europe | Asia and the Pacific | North America | Latin America | Total Production |
| Africa                                  | 42,635 | 339         | 9738        | 933          | 2930                 | 3363          | 503           | 60,442           |
| Middle East                             | 20     | 2049        | 354         | 75           | 215                  | 220           | 17            | 2951             |
| Europe OECD                             | 28     | 48          | 7102        | 160          | 155                  | 160           | 35            | 7687             |
| Other Europe                            | 16     | 59          | 592         | 5316         | 130                  | 75            | 50            | 6238             |
| Asia and the Pacific                    | 254    | 476         | 6720        | 1263         | 92,301               | 4116          | 268           | 105,399          |
| North America                           | 11     | 9           | 92          | 9            | 105                  | 3746          | 12            | 3983             |
| Latin America                           | 53     | 56          | 1927        | 268          | 601                  | 1470          | 8747          | 13,121           |
| Total Consumption                       | 43,016 | 3037        | 26,524      | 8025         | 96,437               | 13,149        | 9632          | 199,821          |
| Hazardous Child Labor (1000 p-yeq)      |        |             |             |              |                      |               |               |                  |
| from\to                                 | Africa | Middle East | Europe OECD | Other Europe | Asia and the Pacific | North America | Latin America | Total Production |
| Africa                                  | 25,383 | 202         | 5798        | 555          | 1744                 | 2002          | 300           | 35,984           |
| Middle East                             | 17     | 1730        | 299         | 63           | 182                  | 186           | 14            | 2492             |
| Europe OECD                             | 23     | 40          | 5997        | 135          | 131                  | 135           | 30            | 6491             |
| Other Europe                            | 13     | 50          | 500         | 4489         | 110                  | 63            | 42            | 5268             |
| Asia and the Pacific                    | 108    | 202         | 2849        | 536          | 39,131               | 1745          | 114           | 44,684           |
| North America                           | 9      | 8           | 77          | 8            | 88                   | 3163          | 10            | 3364             |
| Latin America                           | 35     | 38          | 1287        | 179          | 401                  | 982           | 5843          | 8766             |
| Total Consumption                       | 25,589 | 2270        | 16,807      | 5966         | 41,788               | 8276          | 6352          | 107,049          |
| Forced Labor (1000 p-yeq)               |        |             |             |              |                      |               |               |                  |
| from\to                                 | Africa | Middle East | Europe OECD | Other Europe | Asia and the Pacific | North America | Latin America | Total Production |
| Africa                                  | 1647   | 13          | 376         | 36           | 113                  | 130           | 19            | 2335             |
| Middle East                             | 3      | 266         | 42          | 9            | 29                   | 27            | 2             | 379              |
| Europe OECD                             | 2      | 5           | 684         | 16           | 13                   | 14            | 3             | 737              |
| Other Europe                            | 2      | 8           | 75          | 724          | 20                   | 11            | 10            | 849              |
| Asia and the Pacific                    | 18     | 34          | 480         | 90           | 6590                 | 296           | 19            | 7528             |
| North America                           | 1      | 1           | 8           | 1            | 9                    | 305           | 1             | 325              |
| Latin America                           | 4      | 4           | 156         | 22           | 48                   | 119           | 673           | 1027             |
| Total Consumption                       | 1678   | 332         | 1822        | 897          | 6822                 | 901           | 728           | 13,180           |



## References

1. Tukker, A.; de Koning, A.; Wood, R.; Hawkins, T.; Lutter, S.; Acosta, J.; Rueda Cantuche, J.M.; Bouwmeester, M.; Oosterhaven, J.; Drosdowski, T.; *et al.* Exiopol—Development and illustrative analyses of a detailed global MR EE SUT/IOT. *Econ. Syst. Res.* **2013**, *25*, 50–70.
2. CREEA. Available online: <http://creea.eu> (accessed on 23 October 2014).
3. ILO. LABORSTA—Database on Labour Statistics. Available online: <http://laborsta.ilo.org/> (accessed on 7 January 2013).
4. OECD. STAN Indicators Rev. 3, 2011; 2011. Available online: [http://www.oecd-ilibrary.org/industry-and-services/data/stan-oecd-structural-analysis-statistics/stan-indicators\\_data-00561-en](http://www.oecd-ilibrary.org/industry-and-services/data/stan-oecd-structural-analysis-statistics/stan-indicators_data-00561-en) (accessed on 7 January 2013).
5. Hyder, A.A.; Rotllant, G.; Morrow, R.H. Measuring the burden of disease: Healthy life-years. *Am. J. Public Health* **1998**, *88*, 196–202.
6. Murray, C.J.; Lopez, A.D. *The Global Burden of Disease: A Comprehensive Assessment of Mortality and Disability from Diseases, Injuries, and Risk Factors in 1990 and Projected to 2020*; Global Burden of Disease and Injury Series; Harvard University Press: Cambridge, MA, USA, 1996.
7. Murray, C.J.; Salomon, J.A.; Mathers, C. A critical examination of summary measures of population health. *Bull. World Health Organ.* **2000**, *78*, 981–994.
8. Weinstein, M.C.; Stason, W.B. Foundations of Cost-Effectiveness Analysis for Health and Medical Practices. *N. Engl. J. Med.* **1977**, *296*, 716–721.
9. Nelson, D.I.; Concha-Barrientos, M.; Driscoll, T.; Steenland, K.; Fingerhut, M.; Punnett, L.; Prüss-Ustün, A.; Leigh, J.; Corvalan, C. The global burden of selected occupational diseases and injury risks: Methodology and summary. *Am. J. Ind. Med.* **2005**, *48*, 400–418.
10. Murray, C.J. Quantifying the burden of disease: The technical basis for disability-adjusted life years. *Bull. World Health Organ.* **1994**, *72*, 429–445.
11. Concha-Barrientos, M.; Nelson, D.I.; Driscoll, T.; Steenland, K.; Punnett, L.; Fingerhut, M.; Prüss-Ustün, A.; Leigh, J.; Tak, S.; Corvalan, C. Selected occupational risk factors. In *Comparative Quantification of Health Risks: Global and Regional Burden of Disease Attributable to Selected Major Risk Factors*; World Health Organization: Geneva, Switzerland, 2004.
12. European Commission. Theme 3—Population and Social Conditions, 2003 ed. In *Work and Health in the EU: A Statistical Portrait, Data 1994–2002*; Office for Official Publications of the European Communities: Luxembourg, Luxembourg, 2004.
13. Concha-Barrientos, M.; Nelson, D.I.; Fingerhut, M.; Driscoll, T.; Leigh, J. The global burden due to occupational injury. *Am. J. Ind. Med.* **2005**, *48*, 470–481.
14. ILO. *Guide to the Millennium Development Goals Employment Indicators*, 2nd ed.; International Labour Office, Employment Sector: Geneva, Switzerland, 2013.
15. ILO. *Global Employment Trends: January 2008*; International Labour Organization: Geneva, Switzerland, 2008.
16. ILO. *International Standard Classification of Occupations: ISCO-08*; ILO: Geneva, Switzerland, 2012.

17. UNESCO. *International Standard Classification of Education ISCED 2011*; UNESCO Institute for Statistics: Montreal, PQ, Canada, 2012.
18. ILO. *Children in Hazardous Work What We Know, What We Need to Do*; International Labour Office: Geneva, Switzerland, 2011.
19. ILO. *Accelerating Action against Child Labour: Global Report under the Follow-Up to the ILO Declaration on Fundamental Principles and Rights at Work: Report of the Director-General*; International Labour Organization: Geneva, Switzerland, 2010.
20. U.S. DOL. *List of Goods Produced by Child Labor or Forced Labor 2012—Report Required by the Trafficking Victims Protection Reauthorization Act of 2005*; U.S. Department of Labor: Washington, DC, USA, 2012.
21. ILO. *ILO Global Estimate of Forced Labour: Results and Methodology*; International Labour Office: Geneva, Switzerland, 2012.

© 2014 by the authors; licensee MDPI, Basel, Switzerland. This article is an open access article distributed under the terms and conditions of the Creative Commons Attribution license (<http://creativecommons.org/licenses/by/4.0/>).
